# Supplementary material for: Enzyme-catalyzed domino reaction: efficient construction of spirocyclic oxindole skeleton using porcine pepsin
Source: Royal Society of Chemistry journal article supplement (doi:10.1039/c5cy00987a), 2015-11-03
Supplement: c5cy00987a1.pdf [file c5cy00987a1.pdf]

**Supporting information**

**Enzyme-catalyzed domino reaction: Efficient construction of  
spirocyclic oxindole skeleton using porcine pepsin**

Yan-Hong He\*, Tao He, Jun-Tao Guo, Rui Li, Yang Xiang, Da-Cheng Yang, Zhi Guan\*

*Key Laboratory of Applied Chemistry of Chongqing Municipality, School of Chemistry and Chemical Engineering,*

*Southwest University, Chongqing 400715, PR China*

*Fax: +86-23-68254091; e-mails: heyh@swu.edu.cn (for Yan-Hong He); guanzhi@swu.edu.cn (for Zhi Guan)*

|                                                                                              |           |
|----------------------------------------------------------------------------------------------|-----------|
| <b>1. General information.....</b>                                                           | <b>2</b>  |
| <b>2. Enzymatic assay of pepsin .....</b>                                                    | <b>2</b>  |
| <b>3. Characterization data of the products .....</b>                                        | <b>2</b>  |
| <b>4. <sup>1</sup>H NMR, <sup>13</sup>C NMR and HRMS spectra copies of the products.....</b> | <b>18</b> |
| <b>5. References .....</b>                                                                   | <b>47</b> |

## 1. General information

$^1\text{H}$  NMR spectra and  $^{13}\text{C}$  NMR spectra were respectively recorded on 300 MHz or 600 MHz and 75 MHz or 151 MHz NMR spectrometers. Chemical shifts ( $\delta$ ) were expressed in ppm with TMS as internal standard, and coupling constants ( $J$ ) were reported in Hz. Routine monitoring of reaction was performed by TLC using precoated Haiyang GF254 silica gel TLC plates. Flash column chromatography was performed using silica gel (100–200 mesh) from Haiyang Chemical Industry Research Institute, Qingdao, P. R. China. Petroleum ether used was of boiling range 60–80°C. The organic extracts were dried over anhydrous sodium sulfate. Evaporation of solvent was performed at reduced pressure. Relative configurations of the products were determined by comparison with the  $^1\text{H}$  NMR and  $^{13}\text{C}$  NMR analysis of known compounds. Some unknown compounds were further determined by HRMS. Unless otherwise stated, all reagents were purchased from commercial suppliers and used without further purification.

## 2. Enzymatic assay of pepsin

Unit definition ( $\text{U mg}^{-1}$ ): One unit will produce a  $\Delta\text{A}_{280}$  of 0.001 per min at pH 2.0 at 37 °C, measured as TCA-soluble products using hemoglobin as substrate. (Final volume = 16 mL. Light path = 1 cm.).

The enzymatic assay was conducted according to the literature.<sup>1</sup>

## 3. Characterization data of the products

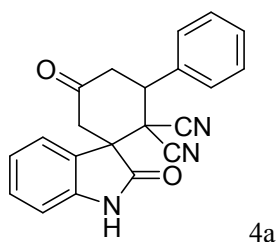

4a

2',5-dioxo-3-phenylspiro[cyclohexane-1,3'-indoline]-2,2-dicarbonitrile<sup>2</sup>

Pale-yellow solid, 96% yield, 97:3 dr

Mp 247-249 °C. <sup>1</sup>H NMR (300 MHz, DMSO-d<sub>6</sub>) δ 11.42 (s, 1H), 7.70 – 7.35 (m, 7H), 7.23 – 7.01 (m, 2H), 4.67 (dd, *J* = 13.5, 3.7 Hz, 1H), 3.57 – 3.40 (m, 2H), 2.77 – 2.66 (m, 1H), 2.61 (d, *J* = 16.0 Hz, 1H). <sup>13</sup>C NMR (75 MHz, DMSO-d<sub>6</sub>) δ 208.28, 181.20, 148.35, 141.54, 137.36, 135.79, 135.40, 135.31, 132.41, 130.78, 129.28, 119.01, 118.43, 117.30, 59.34, 53.15, 48.92, 48.43, 47.59.

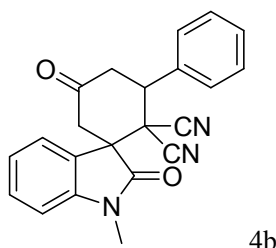

4b

1'-methyl-2',5-dioxo-3-phenylspiro[cyclohexane-1,3'-indoline]-2,2-dicarbonitrile<sup>2</sup>

Pale-yellow solid, 84% yield, 95:5 dr.

Mp 195-197 °C. <sup>1</sup>H NMR (600 MHz, DMSO-d<sub>6</sub>) δ 7.73 (d, *J* = 7.4 Hz, 1H), 7.56 – 7.51 (m, 3H), 7.51 – 7.44 (m, 3H), 7.30 – 7.25 (m, 2H), 4.71 (dd, *J* = 13.7, 4.1 Hz, 1H), 3.56 – 3.44 (m, 2H), 3.26 (s, 3H), 2.79 – 2.62 (m, 2H). <sup>13</sup>C NMR (151 MHz, DMSO-d<sub>6</sub>) δ 202.12, 173.47, 143.92, 135.58, 131.53, 129.87, 129.45, 129.38, 125.72, 124.55, 124.00, 112.96, 112.53, 110.48, 53.25, 47.36, 43.20, 42.40, 41.78, 27.22.

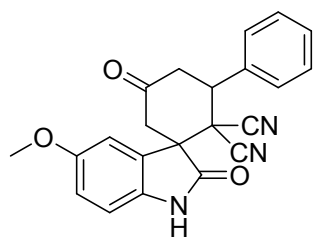

4c

5'-methoxy-2',5-dioxo-3-phenylspiro[cyclohexane-1,3'-indoline]-2,2-dicarbonitrile<sup>2</sup>

Pale-yellow solid, 99% yield, >99:1 dr

Mp 134-136 °C. <sup>1</sup>H NMR (600 MHz, DMSO-d<sub>6</sub>) δ 11.24 (s, 1H), 7.54 – 7.45 (m, 5H), 7.26 (t, *J* = 6.6 Hz, 1H), 7.00 (dt, *J* = 21.0, 5.5 Hz, 2H), 4.70 (dd, *J* = 13.7, 4.1 Hz, 1H), 3.77 (s, 3H), 3.50 – 3.42 (m, 2H), 2.71 (d, *J* = 15.7 Hz, 1H), 2.59 (d, *J* = 16.1 Hz, 1H). <sup>13</sup>C NMR (151 MHz, DMSO-d<sub>6</sub>) δ 202.13, 175.09, 155.82, 135.65, 135.47, 129.84, 129.43, 129.37, 127.61, 115.69, 113.05, 112.48, 112.26, 111.90, 56.05, 53.71, 47.25, 43.06, 42.68, 41.76.

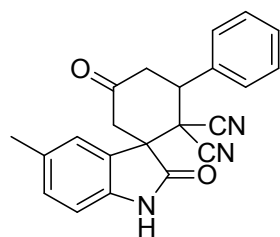

4d

5'-methyl-2',5-dioxo-3-phenylspiro[cyclohexane-1,3'-indoline]-2,2-dicarbonitrile<sup>2</sup>

Pale-yellow solid, 99% yield, 90:10 dr

Mp 151-153 °C. <sup>1</sup>H NMR (600 MHz, DMSO-d<sub>6</sub>) δ 11.30 (s, 1H), 7.53 – 7.45 (m, 6H), 7.23 (dd, *J* = 8.0, 0.8 Hz, 1H), 6.95 (d, *J* = 7.9 Hz, 1H), 4.70 (dd, *J* = 13.7, 4.1 Hz, 1H), 3.51 – 3.38 (m, 2H), 2.74 – 2.54 (m, 2H), 2.32 (s, 3H). <sup>13</sup>C NMR (151 MHz, DMSO-d<sub>6</sub>) δ 202.16, 175.24, 139.98, 135.67, 132.36, 131.71, 129.83, 129.44, 129.36, 126.59, 125.35, 113.10, 112.51, 111.16, 53.48, 47.25, 43.07, 42.75, 41.80, 21.32.

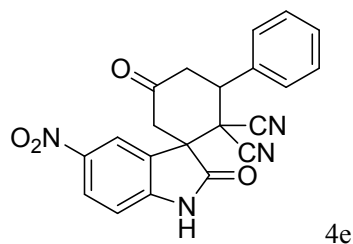

4e

5'-nitro-2',5-dioxo-3-phenylspiro[cyclohexane-1,3'-indoline]-2,2-dicarbonitrile<sup>2</sup>

Yellow solid, 75% yield 90:10 dr

Mp 174-176 °C. <sup>1</sup>H NMR (600 MHz, DMSO-d<sub>6</sub>) δ 12.11 (s, 1H), 8.57 (d, *J* = 2.3 Hz, 1H), 8.40 (dd, *J* = 8.7, 2.3 Hz, 1H), 7.57 – 7.46 (m, 5H), 7.28 (d, *J* = 8.7 Hz, 1H), 4.64 (dd, *J* = 13.7, 4.0 Hz, 1H), 3.66 (t, *J* = 12.9 Hz, 1H), 3.53 (dd, *J* = 15.3, 14.1 Hz, 1H), 2.85 – 2.73 (m, 2H). <sup>13</sup>C NMR (151 MHz, DMSO-d<sub>6</sub>) δ 201.73, 175.72, 148.93, 143.30, 135.33, 129.98, 129.44, 129.15, 128.44, 127.14, 120.95, 112.73, 112.22, 111.78, 53.49, 46.89, 43.09, 41.87, 41.72.

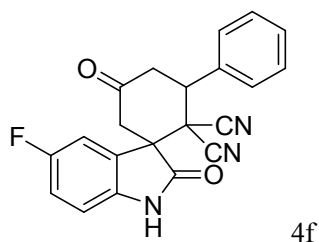

4f

5'-fluoro-2',5-dioxo-3-phenylspiro[cyclohexane-1,3'-indoline]-2,2-dicarbonitrile<sup>2</sup>

Pale-yellow solid, 72% yield, >99:1 dr

Mp 220-221 °C. <sup>1</sup>H NMR (600 MHz, DMSO-d<sub>6</sub>) δ 11.44 (s, 1H), 7.55 – 7.44 (m, 6H), 7.29 (td, *J* = 9.1, 2.6 Hz, 1H), 7.07 (dd, *J* = 8.6, 4.4 Hz, 1H), 4.68 (dd, *J* = 13.7, 4.1 Hz, 1H), 3.48 (dt, *J* = 13.8, 6.7 Hz, 2H), 2.77 – 2.64 (m, 2H). <sup>13</sup>C NMR (151 MHz, DMSO-d<sub>6</sub>) δ 201.89, 175.21, 159.35, 157.76, 138.83, 135.52, 129.89, 129.44, 129.39, 127.86, 127.80, 118.10, 117.95, 113.01, 112.88, 112.83, 112.54, 112.49, 112.34, 53.78, 47.07, 42.99, 42.26.

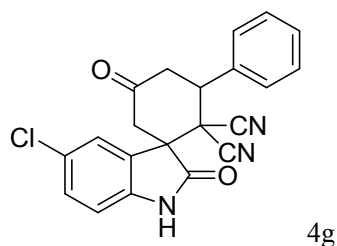

4g

5'-chloro-2',5-dioxo-3-phenylspiro[cyclohexane-1,3'-indoline]-2,2-dicarbonitrile<sup>2</sup>

Yellow solid, 99% yield 88:12 dr

Mp 220-222 °C. <sup>1</sup>H NMR (600 MHz, DMSO-d<sub>6</sub>) δ 11.55 (s, 1H), 7.55 – 7.43 (m, 7H), 7.08 (d, *J* = 8.4 Hz, 1H), 4.66 (dd, *J* = 13.7, 4.0 Hz, 1H), 3.52 – 3.44 (m, 2H), 2.77 – 2.66 (m, 2H). <sup>13</sup>C NMR (151 MHz, DMSO-d<sub>6</sub>) δ 201.92, 175.01, 141.54, 135.48, 131.41, 129.92, 129.44, 129.41, 128.25, 127.18, 125.18, 112.94, 112.88, 112.33, 53.61, 47.07, 43.00, 42.18, 41.73.

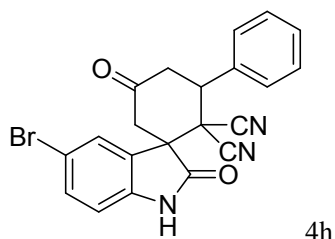

4h

5'-bromo-2',5-dioxo-3-phenylspiro[cyclohexane-1,3'-indoline]-2,2-dicarbonitrile<sup>2</sup>

Pale-yellow solid, 92% yield, 95:5 dr

Mp 146-148 °C. <sup>1</sup>H NMR (600 MHz, DMSO-d<sub>6</sub>) δ 11.55 (s, 1H), 7.81 (d, *J* = 1.5 Hz, 1H), 7.63 (dd, *J* = 8.4, 1.5 Hz, 1H), 7.53 (d, *J* = 7.4 Hz, 2H), 7.51 – 7.44 (m, 3H), 7.03 (d, *J* = 8.4 Hz, 1H), 4.67 (dd, *J* = 13.7, 4.1 Hz, 1H), 3.48 (dd, *J* = 27.6, 15.1 Hz, 2H), 2.78 – 2.64 (m, 2H). <sup>13</sup>C NMR (151 MHz, DMSO-d<sub>6</sub>) δ 201.86, 174.89, 141.95, 135.49, 134.24, 129.91, 129.40, 128.63, 127.88, 114.77, 113.39, 112.88, 112.35, 53.57, 47.09, 43.02, 42.24, 41.76.

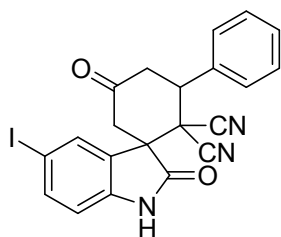

4i

5'-iodo-2',5-dioxo-3-phenylspiro[cyclohexane-1,3'-indoline]-2,2-dicarbonitrile<sup>2</sup>

Pale-yellow solid, 99% yield, 87:13 dr

Mp 190-192 °C. <sup>1</sup>H NMR (600 MHz, DMSO-d<sub>6</sub>) δ 11.55 (s, 1H), 7.97 (d, *J* = 1.2 Hz, 1H), 7.79 (dd, *J* = 8.2, 1.5 Hz, 1H), 7.55 – 7.45 (m, 5H), 6.92 (d, *J* = 8.2 Hz, 1H), 4.67 (dd, *J* = 13.7, 4.1 Hz, 1H), 3.52 – 3.44 (m, 2H), 2.77 – 2.65 (m, 2H). <sup>13</sup>C NMR (151 MHz, DMSO-d<sub>6</sub>) δ 201.93, 174.72, 142.34, 139.99, 135.49, 133.34, 132.05, 129.91, 129.43, 129.41, 128.89, 113.75, 112.92, 112.36, 53.34, 47.10, 43.01, 42.26, 41.75.

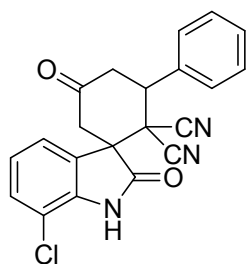

4j

7'-chloro-2',5-dioxo-3-phenylspiro[cyclohexane-1,3'-indoline]-2,2-dicarbonitrile<sup>2</sup>

Brown solid, 73% yield, 88:12 dr.

Mp 238-240 °C. <sup>1</sup>H NMR (600 MHz, DMSO-d<sub>6</sub>) δ 11.88 (s, 1H), 7.63 (d, *J* = 7.6 Hz, 1H), 7.49 (ddd, *J* = 13.7, 10.2, 5.2 Hz, 6H), 7.23 (t, *J* = 8.0 Hz, 1H), 4.66 (dd, *J* = 13.7, 4.0 Hz, 1H), 3.55 – 3.40 (m, 2H), 2.81 – 2.49 (m, 2H). <sup>13</sup>C NMR (151 MHz, DMSO-d<sub>6</sub>) δ 201.87, 175.31, 140.40, 135.48, 131.43, 129.91, 129.45, 129.39, 129.16, 128.18, 124.65, 123.56, 115.55, 112.92, 112.33, 54.23, 47.17, 43.04, 42.30, 41.73.

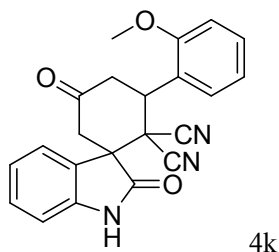

3-(2-methoxyphenyl)-2',5-dioxospiro[cyclohexane-1,3'-indoline]-2,2-dicarbonitrile<sup>2</sup>

Pale-yellow solid, 85% yield, 82:18 dr

Mp 151-153 °C. <sup>1</sup>H NMR (600 MHz, DMSO-d<sub>6</sub>) δ 11.37 (s, 1H), 7.66 (d, *J* = 7.6 Hz, 1H), 7.63 –

7.61 (m, 1H), 7.43 – 7.39 (m, 2H), 7.20 – 7.16 (m, 1H), 7.11 (d, *J* = 8.5 Hz, 2H), 7.03 (d, *J* = 7.8

Hz, 1H), 5.49 (dd, *J* = 14.1, 4.0 Hz, 1H), 3.76 (s, 3H), 3.59 – 3.41 (m, 2H), 2.63 – 2.53 (m, 2H).

<sup>13</sup>C NMR (151 MHz, DMSO-d<sub>6</sub>) δ 202.44, 175.15, 157.46, 142.50, 131.33, 130.85, 128.56,

126.64, 124.76, 123.99, 123.22, 121.17, 113.01, 112.84, 112.01, 111.23, 56.06, 53.30, 46.72,

42.79, 41.83, 33.61.

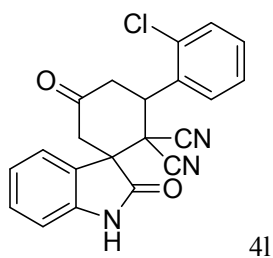

3-(2-chlorophenyl)-2',5-dioxospiro[cyclohexane-1,3'-indoline]-2,2-dicarbonitrile<sup>2</sup>

Pale-yellow solid, 99% yield, >99:1 dr

Mp 200-202 °C. <sup>1</sup>H NMR (600 MHz, DMSO-d<sub>6</sub>) δ 11.42 (s, 1H), 7.88 – 7.84 (m, 1H), 7.68 (d, *J* =

7.6 Hz, 1H), 7.60 (d, *J* = 8.0 Hz, 1H), 7.55 (t, *J* = 7.3 Hz, 1H), 7.49 (dd, *J* = 7.7, 1.2 Hz, 1H), 7.43

(t, *J* = 7.7 Hz, 1H), 7.20 (t, *J* = 7.7 Hz, 1H), 7.05 (d, *J* = 7.8 Hz, 1H), 5.62 (dd, *J* = 13.7, 4.0 Hz,

1H), 3.46 (t, *J* = 14.8 Hz, 2H), 2.72 – 2.64 (m, 2H). <sup>13</sup>C NMR (151 MHz, DMSO-d<sub>6</sub>) δ 201.72,



175.11, 142.49, 134.69, 133.43, 131.48, 131.37, 130.63, 129.77, 128.47, 126.34, 124.82, 123.33, 112.64, 112.33, 111.37, 53.24, 46.25, 42.72, 42.09, 37.27.

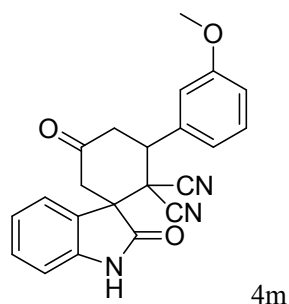

3-(4-methoxyphenyl)-2',5-dioxospiro[cyclohexane-1,3'-indoline]-2,2-dicarbonitrile<sup>2</sup>

Pale-yellow solid, 95% yield, 95:5 dr

Mp 156-158 °C. <sup>1</sup>H NMR (600 MHz, DMSO-d<sub>6</sub>) δ 11.37 (s, 1H), 7.66 (d, *J* = 7.6 Hz, 1H), 7.41 (dt, *J* = 15.4, 7.8 Hz, 2H), 7.19 (t, *J* = 7.7 Hz, 1H), 7.09 – 7.01 (m, 4H), 4.65 (dd, *J* = 13.6, 4.1 Hz, 1H), 4.29 (dd, *J* = 13.8, 4.0 Hz, 1H), 3.79 (s, 3H), 3.51 – 3.38 (m, 2H), 2.75 – 2.55 (m, 2H). <sup>13</sup>C NMR (151 MHz, DMSO-d<sub>6</sub>) δ 202.06, 175.24, 159.87, 142.46, 137.16, 130.47, 126.51, 124.83, 123.34, 121.50, 115.31, 113.07, 112.63, 111.38, 55.67, 53.48, 47.15, 43.03, 42.66, 41.88.

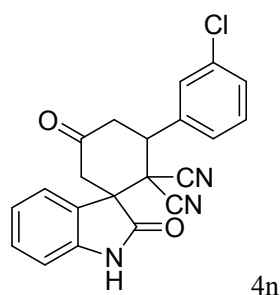

3-(3-chlorophenyl)-2',5-dioxospiro[cyclohexane-1,3'-indoline]-2,2-dicarbonitrile<sup>2</sup>

Pale-purple solid, 86% yield, >99:1 dr

Mp 215-217 °C. <sup>1</sup>H NMR (600 MHz, DMSO-d<sub>6</sub>) δ 11.41 (s, 1H), 7.66 (d, *J* = 7.6 Hz, 1H), 7.61 (s,

1H), 7.56 – 7.49 (m, 3H), 7.43 (td,  $J = 7.8, 1.1$  Hz, 1H), 7.20 (td,  $J = 7.7, 0.8$  Hz, 1H), 7.05 (d,  $J = 7.8$  Hz, 1H), 4.71 (dd,  $J = 13.6, 4.2$  Hz, 1H), 3.55 – 3.48 (m, 1H), 3.41 (d,  $J = 16.0$  Hz, 1H), 2.75 (dd,  $J = 15.6, 4.1$  Hz, 1H), 2.62 (dd,  $J = 16.0, 1.7$  Hz, 1H).  $^{13}\text{C}$  NMR (151 MHz, DMSO- $d_6$ )  $\delta$  201.88, 175.14, 142.46, 137.98, 133.95, 131.48, 131.21, 129.92, 129.37, 128.41, 126.39, 124.86, 123.39, 112.93, 112.34, 111.42, 53.38, 46.99, 42.65, 42.57, 41.42.

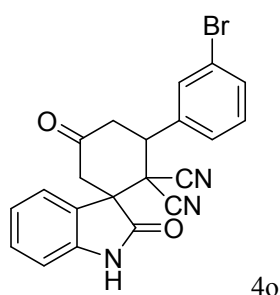

3-(3-bromophenyl)-2',5-dioxospiro[cyclohexane-1,3'-indoline]-2,2-dicarbonitrile<sup>2</sup>

Pale-purple solid, 85% yield, 99:1 dr

Mp 145-147 °C.  $^1\text{H}$  NMR (600 MHz, DMSO- $d_6$ )  $\delta$  11.41 (s, 1H), 7.74 (s, 1H), 7.70 – 7.64 (m, 2H), 7.55 (d,  $J = 7.8$  Hz, 1H), 7.45 (dt,  $J = 19.2, 7.8$  Hz, 2H), 7.20 (t,  $J = 7.6$  Hz, 1H), 7.06 (d,  $J = 7.8$  Hz, 1H), 4.71 (dd,  $J = 13.6, 3.9$  Hz, 1H), 3.51 (t,  $J = 14.7$  Hz, 1H), 3.41 (d,  $J = 16.0$  Hz, 1H), 2.80 – 2.72 (m, 1H), 2.62 (d,  $J = 16.0$  Hz, 1H).  $^{13}\text{C}$  NMR (151 MHz, DMSO- $d_6$ )  $\delta$  201.82, 175.14, 142.47, 138.21, 132.82, 132.23, 131.48, 131.46, 128.75, 126.39, 124.85, 123.39, 122.46, 112.93, 112.34, 111.43, 53.40, 47.02, 42.62, 41.44.

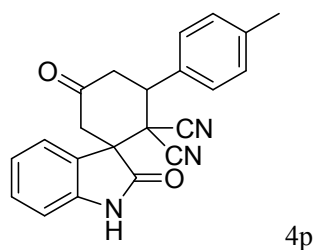

2',5-dioxo-3-(p-tolyl)spiro[cyclohexane-1,3'-indoline]-2,2-dicarbonitrile<sup>2</sup>

Pale-yellow solid, 97% yield, 87:13 dr

Mp 175-177 °C. <sup>1</sup>H NMR (600 MHz, DMSO-d<sub>6</sub>) δ 11.37 (s, 1H), 7.65 (d, *J* = 7.6 Hz, 1H), 7.46 – 7.37 (m, 3H), 7.27 (dd, *J* = 15.5, 8.1 Hz, 2H), 7.21 – 7.16 (m, 1H), 7.04 (d, *J* = 7.9 Hz, 1H), 4.64 (dd, *J* = 13.7, 4.1 Hz, 1H), 3.50 – 3.38 (m, 2H), 2.71 – 2.55 (m, 2H), 2.33 (s, 3H). <sup>13</sup>C NMR (151 MHz, DMSO-d<sub>6</sub>) δ 202.17, 175.29, 142.45, 139.39, 132.68, 131.38, 129.92, 129.26, 126.56, 124.81, 123.33, 113.13, 112.60, 111.36, 53.45, 47.40, 42.75, 42.67, 41.91, 21.12.

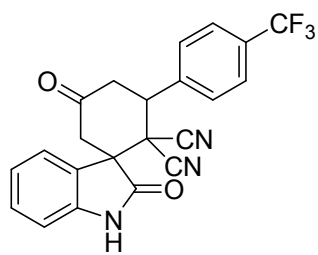

4q

2',5-dioxo-3-(4-(trifluoromethyl)phenyl)spiro[cyclohexane-1,3'-indoline]-2,2-dicarbonitrile<sup>2</sup>

Pale-yellow solid, 95% yield, 87:13 dr

Mp 200-202 °C. <sup>1</sup>H NMR (600 MHz, DMSO-d<sub>6</sub>) δ 11.44 (s, 1H), 7.88 (d, *J* = 8.3 Hz, 2H), 7.78 (d, *J* = 8.2 Hz, 2H), 7.67 (d, *J* = 7.6 Hz, 1H), 7.43 (t, *J* = 7.8 Hz, 1H), 7.20 (t, *J* = 7.7 Hz, 1H), 7.06 (d, *J* = 7.9 Hz, 1H), 4.82 (dd, *J* = 13.6, 4.1 Hz, 1H), 3.57 – 3.50 (m, 1H), 3.45 (d, *J* = 16.0 Hz, 1H), 2.82 – 2.76 (m, 1H), 2.64 (dd, *J* = 16.0, 1.3 Hz, 1H). <sup>13</sup>C NMR (151 MHz, DMSO-d<sub>6</sub>) δ 201.81, 175.18, 142.46, 140.13, 131.51, 130.72, 132.60, 126.36, 126.27, 125.30, 124.86, 123.50, 123.40, 112.86, 112.27, 111.44, 53.42, 46.78, 42.77, 42.58, 41.31.

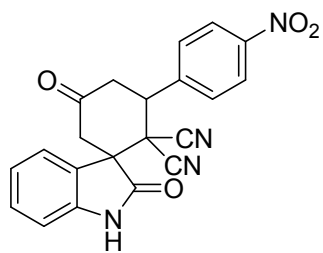

4r

3-(4-nitrophenyl)-2',5-dioxospiro[cyclohexane-1,3'-indoline]-2,2-dicarbonitrile<sup>2</sup>

Yellow solid, 98% yield, 87:13 dr

Mp 203-205 °C. <sup>1</sup>H NMR (600 MHz, DMSO-d<sub>6</sub>) δ 11.45 (s, 1H), 8.35 (d, *J* = 8.8 Hz, 2H), 7.85 (d, *J* = 8.8 Hz, 2H), 7.67 (d, *J* = 7.6 Hz, 1H), 7.44 (t, *J* = 7.7 Hz, 1H), 7.20 (t, *J* = 7.3 Hz, 1H), 7.06 (d, *J* = 7.8 Hz, 1H), 4.88 (dd, *J* = 13.6, 4.1 Hz, 1H), 3.58 – 3.51 (m, 1H), 3.46 (d, *J* = 16.1 Hz, 1H), 2.81 (dd, *J* = 15.7, 2.4 Hz, 1H), 2.66 (d, *J* = 16.1 Hz, 1H). <sup>13</sup>C NMR (151 MHz, DMSO-d<sub>6</sub>) δ 201.58, 175.14, 148.61, 142.61, 142.47, 131.54, 131.18, 126.31, 124.87, 124.31, 123.42, 112.76, 112.16, 111.46, 53.43, 46.57, 42.68, 42.58, 41.22.

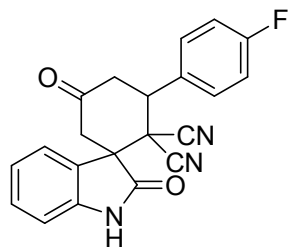

4s

3-(4-fluorophenyl)-2',5-dioxospiro[cyclohexane-1,3'-indoline]-2,2-dicarbonitrile<sup>2</sup>

Pale-yellow solid, 95% yield, 94:6 dr

Mp 187-189 °C. <sup>1</sup>H NMR (600 MHz, DMSO-d<sub>6</sub>) δ 11.40 (s, 1H), 7.66 (d, *J* = 7.6 Hz, 1H), 7.59 (dd, *J* = 8.6, 5.3 Hz, 2H), 7.43 (t, *J* = 7.7 Hz, 1H), 7.34 (t, *J* = 8.7 Hz, 2H), 7.20 (t, *J* = 7.6 Hz, 1H), 7.05 (d, *J* = 7.8 Hz, 1H), 4.71 (dd, *J* = 13.6, 4.1 Hz, 1H), 3.51 – 3.45 (m, 1H), 3.42 (d, *J* = 16.0 Hz, 1H), 2.72 (dd, *J* = 15.7, 2.5 Hz, 1H), 2.61 (d, *J* = 16.0 Hz, 1H). <sup>13</sup>C NMR (151 MHz, DMSO-d<sub>6</sub>) δ

201.98, 175.22, 163.83, 162.19, 142.45, 131.71, 131.65, 131.43, 126.47, 124.83, 123.35, 116.33,  
116.19, 113.02, 112.44, 111.39, 53.35, 47.28, 42.60, 42.37, 41.83.

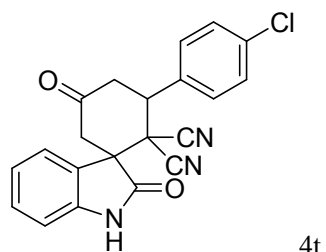

3-(4-chlorophenyl)-2',5-dioxospiro[cyclohexane-1,3'-indoline]-2,2-dicarbonitrile<sup>2</sup>

Pale-yellow solid, 81% yield, 94:6 dr

Mp 134-136 °C. <sup>1</sup>H NMR (600 MHz, DMSO-d<sub>6</sub>) δ 11.40 (s, 1H), 7.66 (d, *J* = 7.6 Hz, 1H), 7.59 – 7.52 (m, 4H), 7.43 (t, *J* = 7.7 Hz, 1H), 7.20 (t, *J* = 7.7 Hz, 1H), 7.06 (d, *J* = 7.8 Hz, 1H), 4.72 (dd, *J* = 13.6, 4.2 Hz, 1H), 3.52 – 3.39 (m, 2H), 2.78 – 2.57 (m, 2H). <sup>13</sup>C NMR (151 MHz, DMSO-d<sub>6</sub>) δ 201.85, 175.20, 142.46, 134.68, 134.60, 131.45, 131.36, 129.38, 126.44, 124.83, 123.37, 112.96, 112.39, 111.41, 53.39, 47.08, 42.63, 42.49, 41.60.

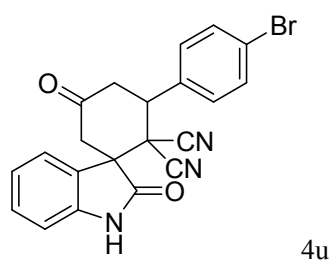

3-(4-bromophenyl)-2',5-dioxospiro[cyclohexane-1,3'-indoline]-2,2-dicarbonitrile<sup>2</sup>

Pale-yellow solid, 81% yield, 92:8 dr

Mp 143-145 °C. <sup>1</sup>H NMR (600 MHz, DMSO-d<sub>6</sub>) δ 11.40 (s, 1H), 7.71 (d, *J* = 8.5 Hz, 2H), 7.67 (t, *J* = 6.7 Hz, 1H), 7.50 (d, *J* = 8.5 Hz, 2H), 7.43 (t, *J* = 7.8 Hz, 1H), 7.20 (t, *J* = 7.7 Hz, 1H), 7.06 (t,

$J = 8.2$  Hz, 1H), 4.71 (dd,  $J = 13.6, 4.1$  Hz, 1H), 4.36 (dd,  $J = 13.8, 4.1$  Hz, 1H), 3.50 – 3.40 (m, 2H), 2.77 – 2.70 (m, 1H), 2.61 (dd,  $J = 16.0, 1.5$  Hz, 1H).  $^{13}\text{C}$  NMR (151 MHz, DMSO- $d_6$ )  $\delta$  201.83, 175.20, 142.45, 135.01, 132.33, 131.64, 131.45, 126.43, 124.83, 123.38, 123.30, 112.96, 112.38, 111.42, 53.40, 46.99, 42.64, 42.56, 41.54.

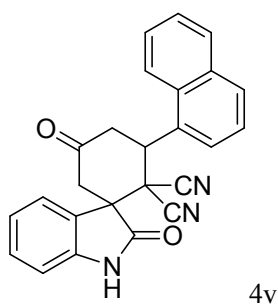

3-(naphthalen-1-yl)-2',5-dioxospiro[cyclohexane-1,3'-indoline]-2,2-dicarbonitrile<sup>2</sup>

White solid, 82% yield, >99:1 dr

Mp 245-247 °C.  $^1\text{H}$  NMR (600 MHz, DMSO- $d_6$ )  $\delta = 11.56$  (s, 1H), 8.12 – 8.01 (m, 3H), 7.98 (d,  $J=7.3$ , 1H), 7.76 – 7.68 (m, 2H), 7.65 (t,  $J=7.2$ , 1H), 7.60 (t,  $J=7.4$ , 1H), 7.44 (t,  $J=7.7$ , 1H), 7.22 (t,  $J=7.6$ , 1H), 7.08 (d,  $J=7.8$ , 1H), 6.05 (dd,  $J=13.7, 3.5$ , 1H), 3.70 – 3.61 (m, 1H), 3.54 (d,  $J=16.1$ , 1H), 2.83 – 2.72 (m, 2H).  $^{13}\text{C}$  NMR (151 MHz, DMSO- $d_6$ )  $\delta = 202.33, 175.88, 142.36, 134.08, 132.03, 131.84, 131.45, 130.26, 129.57, 127.22, 126.75, 126.55, 126.54, 125.93, 124.87, 123.46, 122.75, 112.90, 112.82, 111.44, 53.58, 47.02, 42.97, 42.91, 35.03$ .

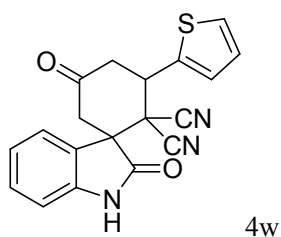

2',5-dioxo-3-(thiophen-2-yl)spiro[cyclohexane-1,3'-indoline]-2,2-dicarbonitrile<sup>2</sup>

Yellow solid, 72% yield, >99:1 dr

Mp 230-232 °C. <sup>1</sup>H NMR (600 MHz, DMSO-d<sub>6</sub>) δ 11.44 (s, 1H), 7.66 (t, *J* = 6.6 Hz, 2H), 7.44 (t, *J* = 7.7 Hz, 1H), 7.36 (d, *J* = 3.2 Hz, 1H), 7.20 (t, *J* = 7.6 Hz, 1H), 7.17 – 7.13 (m, 1H), 7.06 (d, *J* = 7.8 Hz, 1H), 4.99 (dd, *J* = 13.4, 4.1 Hz, 1H), 3.43 (d, *J* = 16.0 Hz, 1H), 3.37 – 3.29 (m, 1H), 2.88 (dd, *J* = 15.7, 2.5 Hz, 1H), 2.62 (d, *J* = 15.9 Hz, 1H). <sup>13</sup>C NMR (151 MHz, DMSO-d<sub>6</sub>) δ 201.07, 175.24, 142.45, 138.26, 131.48, 128.78, 127.89, 127.71, 126.45, 124.75, 123.44, 113.17, 112.57, 111.47, 53.24, 47.86, 43.62, 42.55, 39.30.

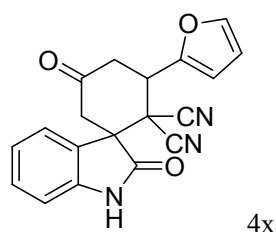

3-(furan-2-yl)-2',5-dioxospiro[cyclohexane-1,3'-indoline]-2,2-dicarbonitrile<sup>2</sup>

Pale-yellow solid, 76% yield, 99:1 dr

Mp 237-239 °C. <sup>1</sup>H NMR (600 MHz, DMSO-d<sub>6</sub>) δ 11.42 (s, 1H), 7.79 (d, *J* = 1.1 Hz, 1H), 7.65 (d, *J* = 7.6 Hz, 1H), 7.44 (td, *J* = 7.8, 0.8 Hz, 1H), 7.20 (t, *J* = 7.4 Hz, 1H), 7.05 (d, *J* = 7.8 Hz, 1H), 6.70 (d, *J* = 3.3 Hz, 1H), 6.56 (dd, *J* = 3.2, 1.8 Hz, 1H), 4.84 (dd, *J* = 13.5, 4.3 Hz, 1H), 3.41 (d, *J* = 16.1 Hz, 1H), 3.30 – 3.23 (m, 1H), 2.84 (dd, *J* = 16.0, 2.6 Hz, 1H), 2.61 (d, *J* = 16.1 Hz, 1H). <sup>13</sup>C NMR (151 MHz, DMSO-d<sub>6</sub>) δ 201.28, 175.24, 149.61, 144.67, 142.47, 131.48, 126.35, 124.74, 123.43, 112.98, 112.33, 111.51, 111.45, 110.67, 53.07, 45.46, 42.61, 40.58, 38.03.

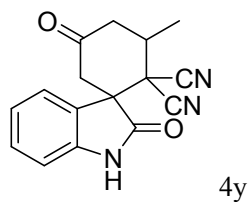

3-methyl-2',5-dioxospiro[cyclohexane-1,3'-indoline]-2,2-dicarbonitrile<sup>2</sup>

Pale-yellow solid, 32% yield, 99:1 dr

Mp 170-172 °C. <sup>1</sup>H NMR (600 MHz, DMSO-d<sub>6</sub>) δ 11.27 (s, 1H), 7.64 (t, *J* = 6.2 Hz, 1H), 7.43 (d, *J* = 6.9 Hz, 1H), 7.20 (d, *J* = 6.8 Hz, 1H), 7.03 (t, *J* = 6.4 Hz, 1H), 3.51 (dd, *J* = 11.4, 5.7 Hz, 1H), 3.26 (d, *J* = 16.0 Hz, 1H), 2.65 (d, *J* = 15.8 Hz, 1H), 2.56 – 2.47 (m, 2H), 1.32 (s, 3H). <sup>13</sup>C NMR (151 MHz, DMSO-d<sub>6</sub>) δ 202.17, 175.12, 142.41, 131.34, 126.63, 124.61, 123.29, 113.63, 112.29, 111.30, 53.05, 46.44, 43.68, 42.54, 33.87, 18.28.

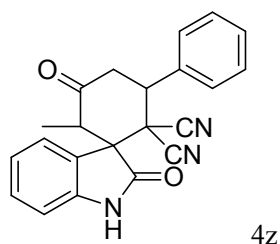

6-methyl-2',5-dioxo-3-phenylspiro[cyclohexane-1,3'-indoline]-2,2-dicarbonitrile

White solid, 89% yield, 58:42 dr

Mp 155-157 °C. <sup>1</sup>H NMR (600 MHz, DMSO-d<sub>6</sub>) δ 11.47 (s, 1H), 7.69 – 7.37 (m, 7H), 7.25 – 7.04 (m, 2H), 4.64-4.31 (m, 1H), 3.67 – 3.43 (m, 2H), 2.86-2.74 (m, 1H), 0.63 (dd, *J* = 48.6, 6.5 Hz, 3H). <sup>13</sup>C NMR (151 MHz, DMSO-d<sub>6</sub>) δ 203.18, 174.11, 142.98, 135.59, 131.42, 129.84, 129.58, 129.38, 129.07, 124.68, 123.62, 113.07, 111.37, 58.62, 48.15, 45.12, 42.95, 41.91, 9.33.

MS(ESI) *m/z*: calcd for C<sub>22</sub>H<sub>17</sub>N<sub>3</sub>O<sub>2</sub> [M+Na]<sup>+</sup> 378.1213, found 378.1221.



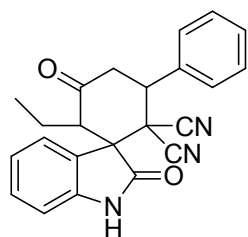

4aa

6-ethyl-2',5-dioxo-3-phenylspiro[cyclohexane-1,3'-indoline]-2,2-dicarbonitrile

White solid, 71% yield, 73:27 dr

Mp 140-142 °C.  $^1\text{H}$  NMR (600 MHz, DMSO- $d_6$ )  $\delta$  11.47 (s, 1H), 7.74 – 7.33 (m, 7H), 7.26 – 7.03 (m, 2H), 4.60-4.27 (m, 1H), 3.67 (dt,  $J = 64.2, 14.4$  Hz, 1H), 3.20 (dd,  $J = 14.5, 5.5$  Hz, 1H), 2.83-2.71 (m, 1H), 1.33 – 1.18 (m, 2H), 0.79 (dd,  $J = 22.7, 15.3$  Hz, 3H).  $^{13}\text{C}$  NMR (151 MHz, DMSO- $d_6$ )  $\delta$  202.63, 174.08, 143.09, 131.47, 129.8, 129.56, 129.34, 129.05, 126.01, 124.70, 123.59, 112.99, 111.35, 58.43, 51.55, 48.43, 43.18, 42.53, 17.74, 13.40.

MS(ESI)  $m/z$ : calcd for  $\text{C}_{23}\text{H}_{19}\text{N}_3\text{O}_2$   $[\text{M}+\text{Na}]^+$  392.1369, found 392.1380.

#### 4. $^1\text{H}$ NMR, $^{13}\text{C}$ NMR and HRMS spectra copies of the products

4a

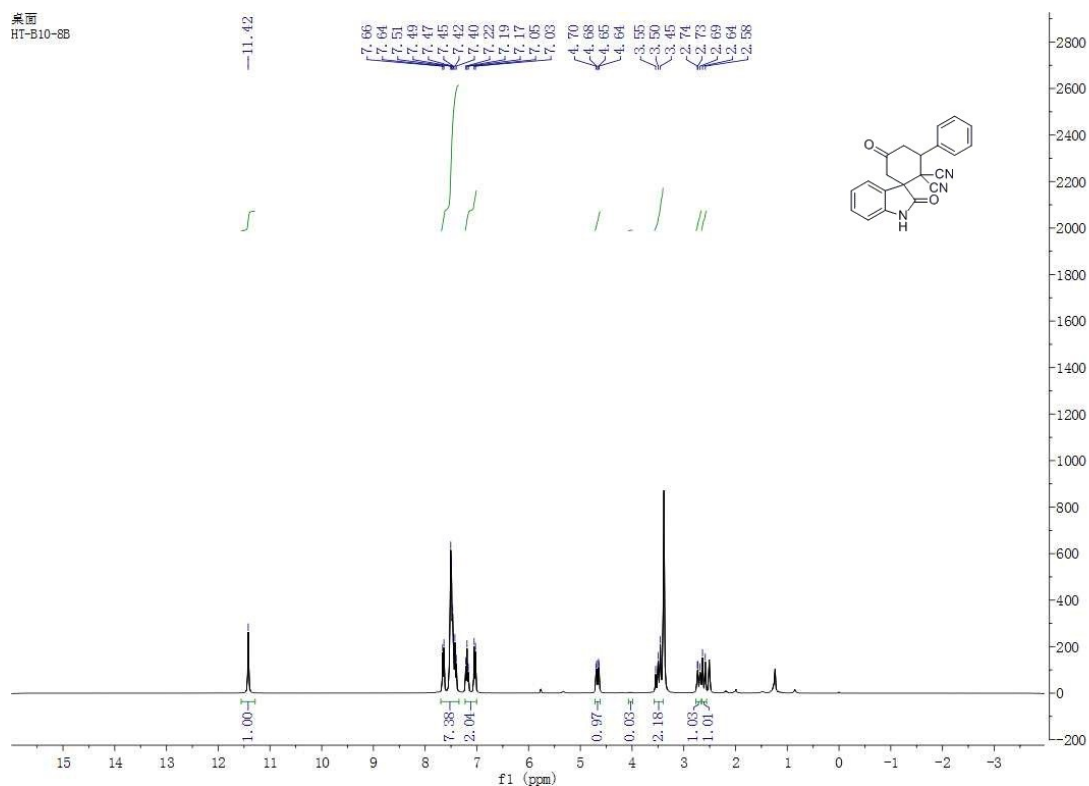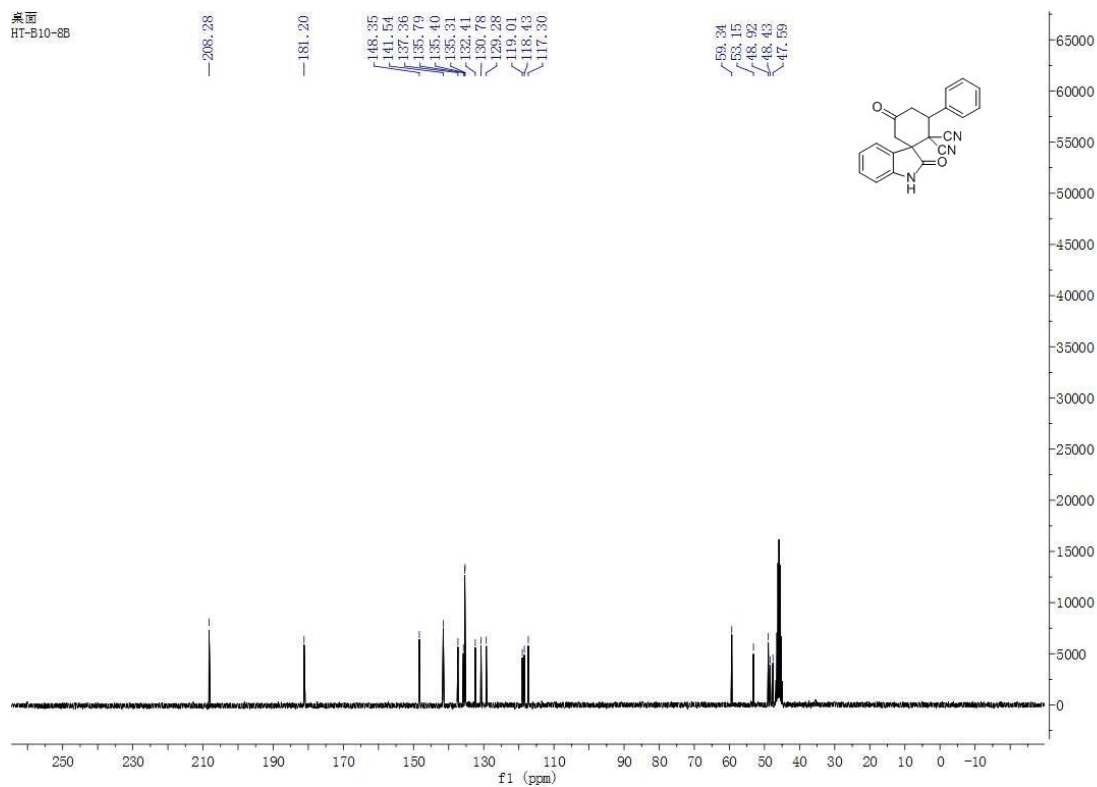

4b

HT-1H  
HT-B10-K-1

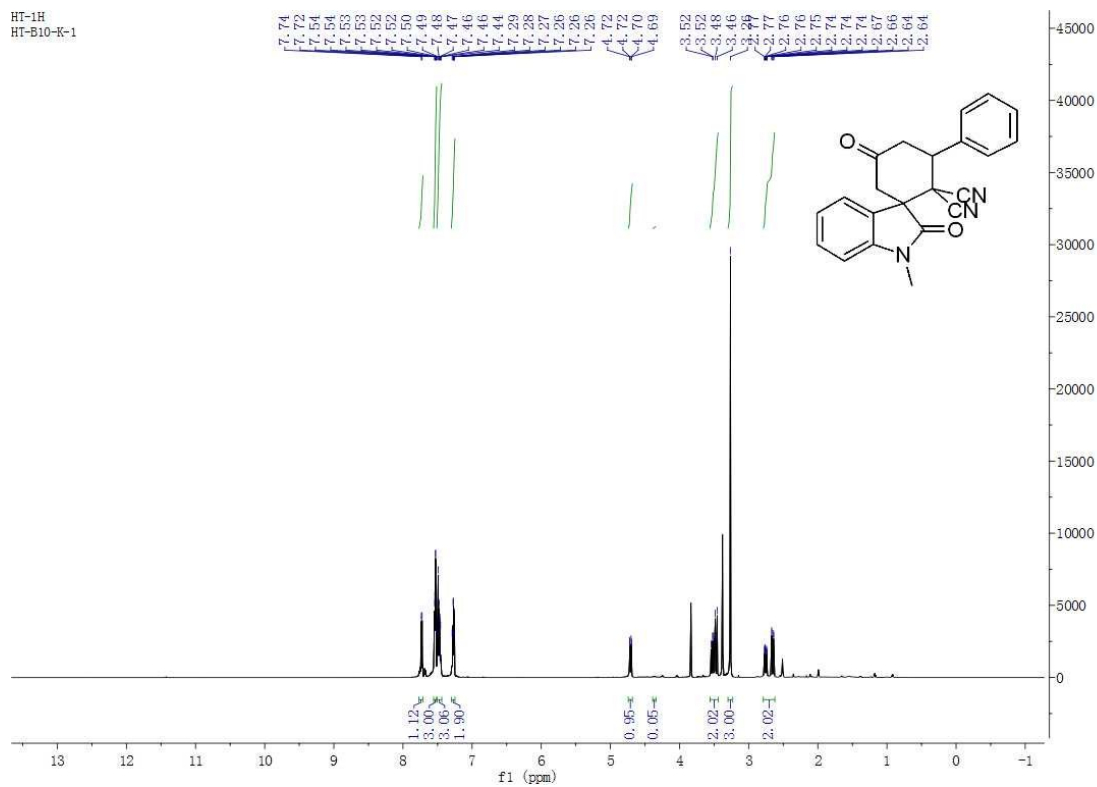

HT-13C  
HT-B10-K-1

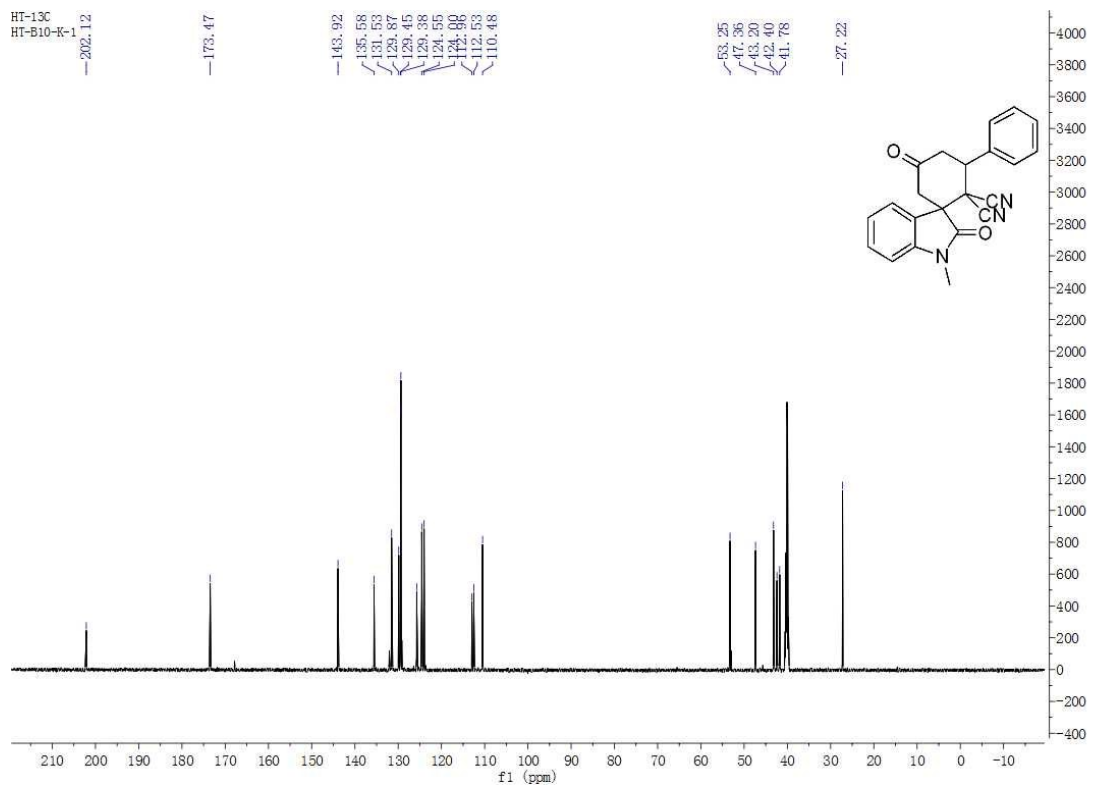

4c

HT-1H  
HT-B10-K-6

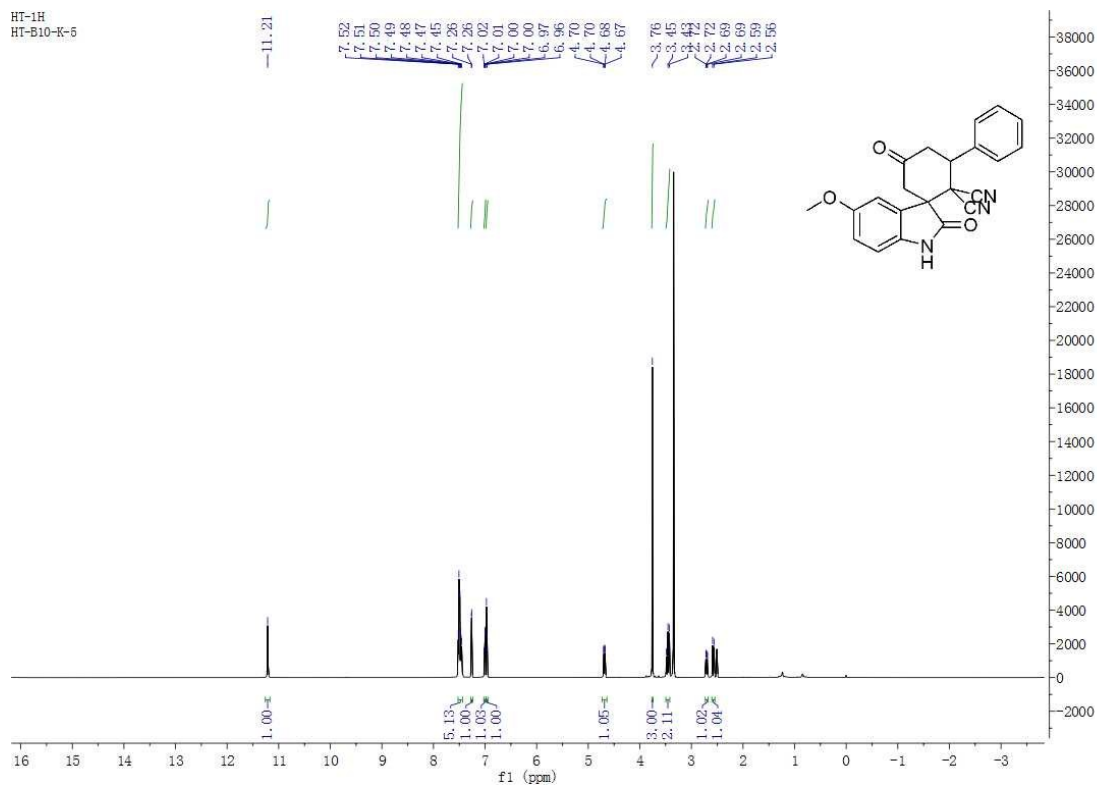

HT-13C  
HT-B10-ku-3

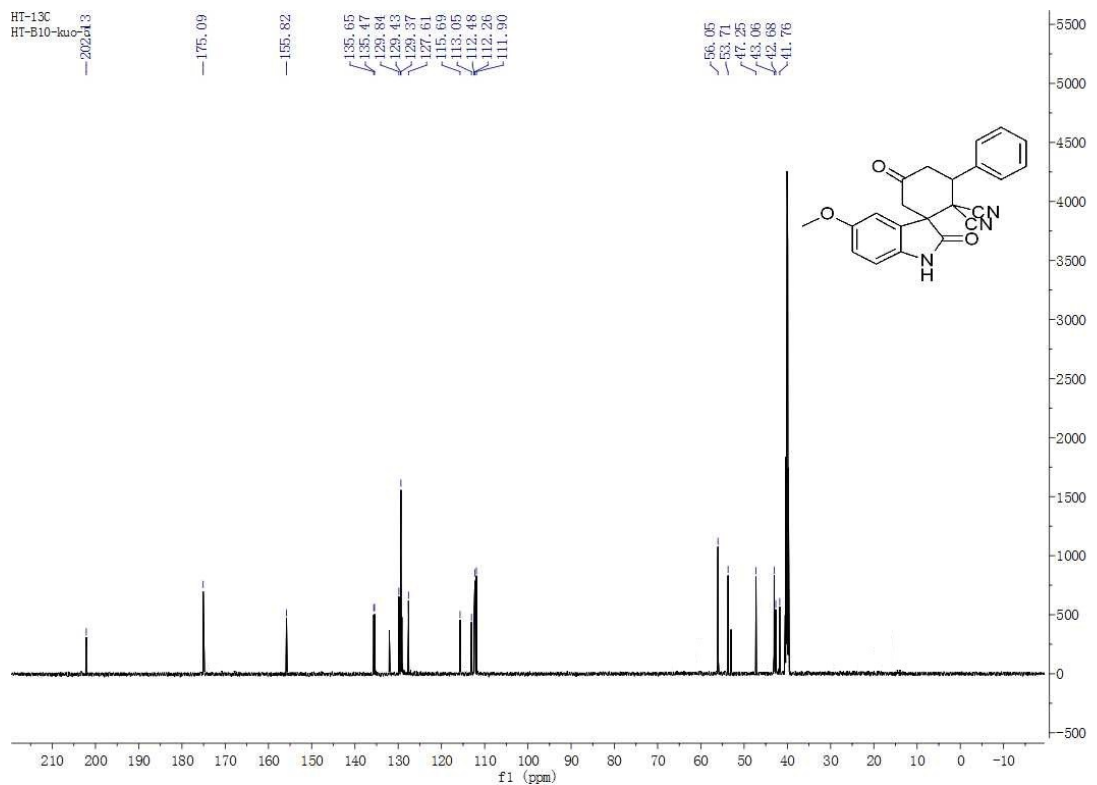

4d

HT-1H  
HT-B10-K-4

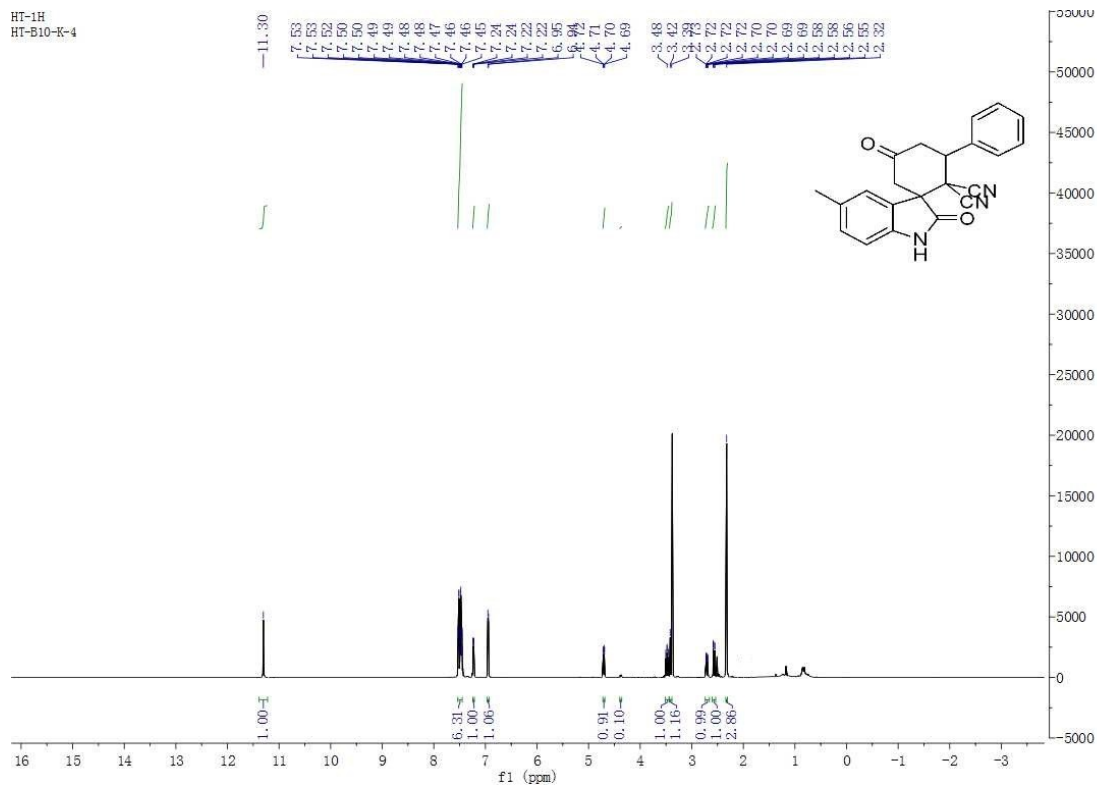

HT-13C  
HT-B10-K-4

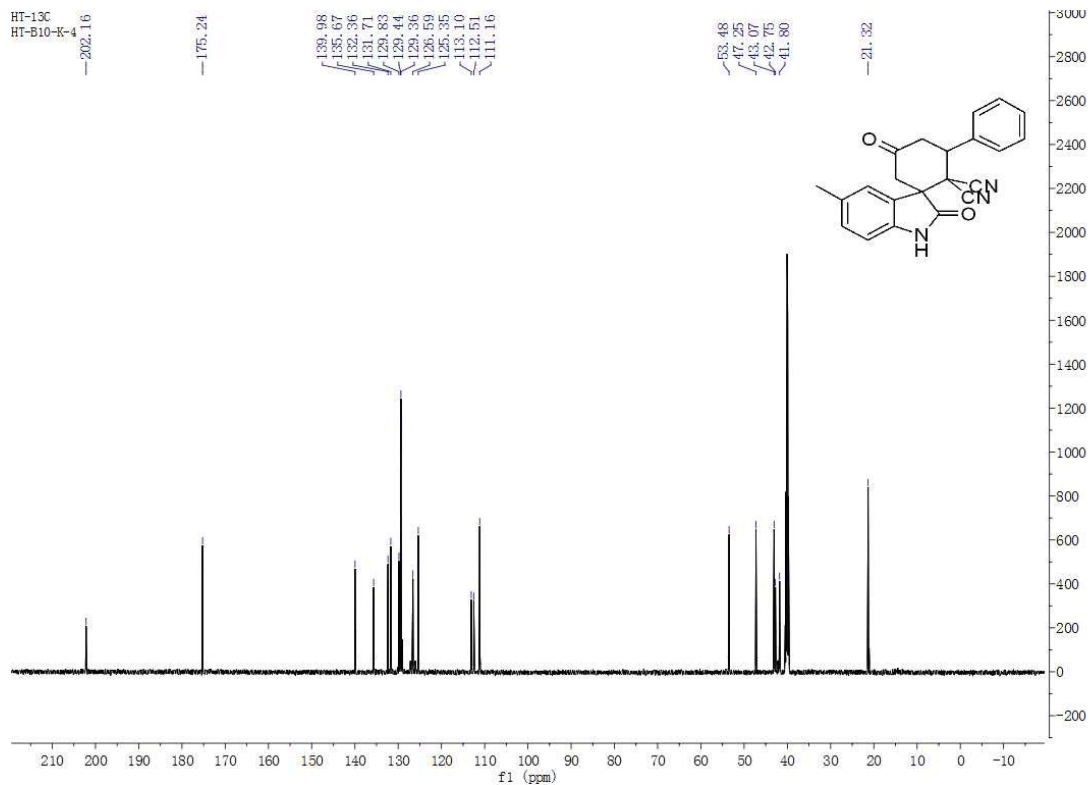

4e

HT-1H  
HT-B10-K-8

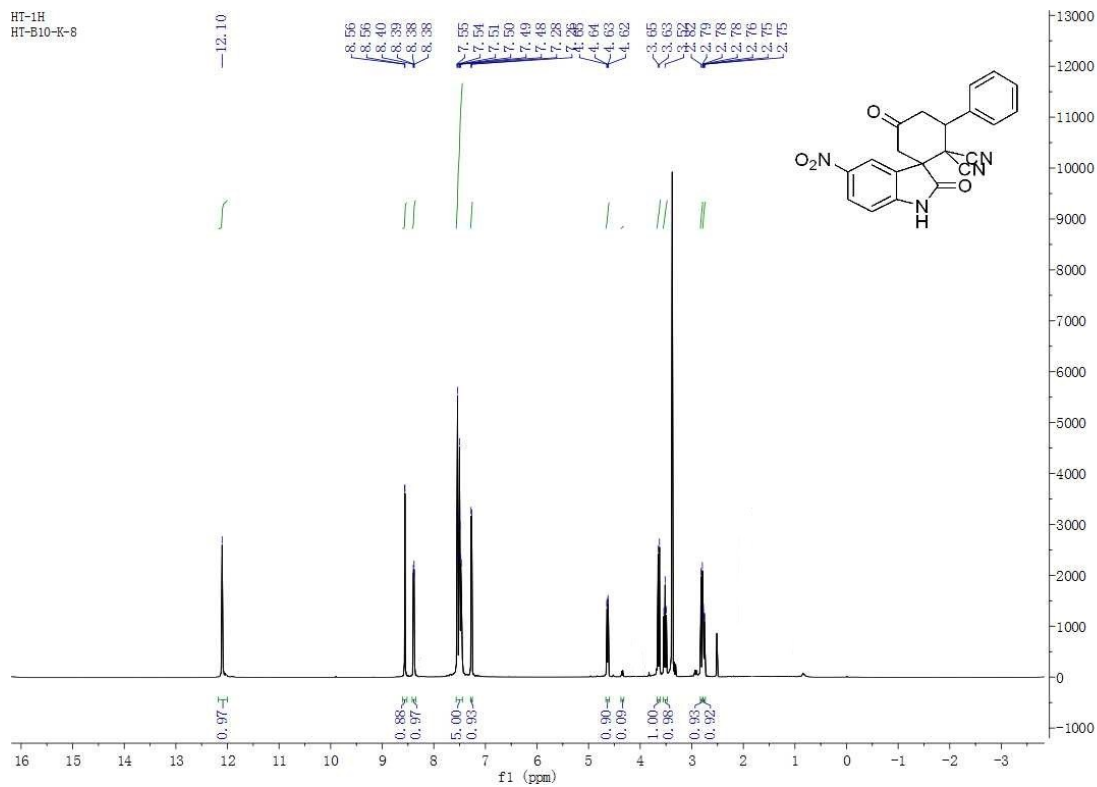

HT-13C  
HT-B10-K-8

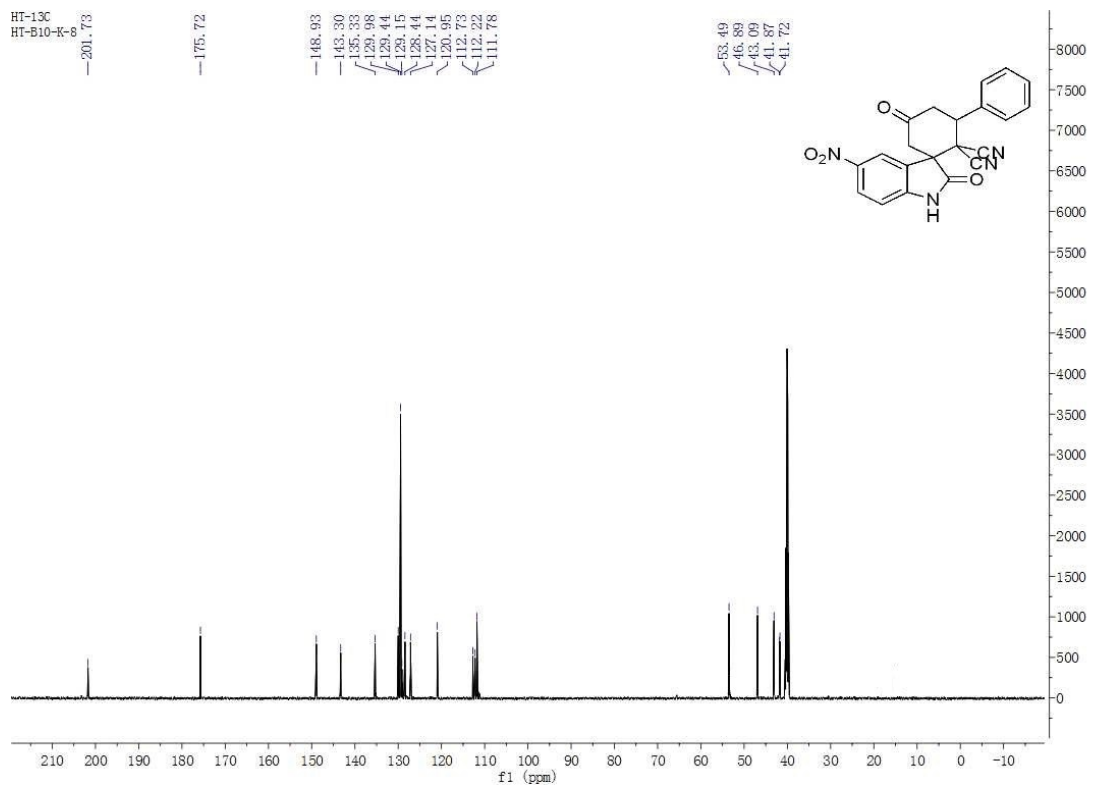

4f

HT-1H  
HT-B10-kuo-3(6-F)

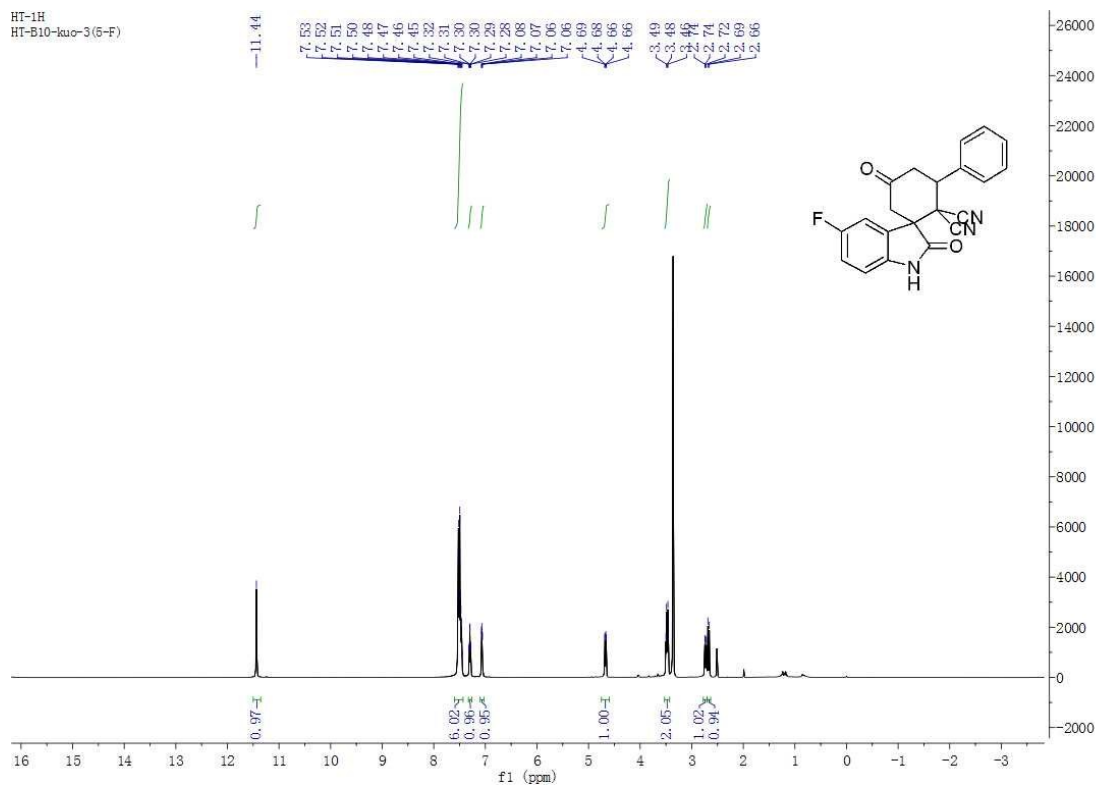

HT-13C  
HT-B10-K-3

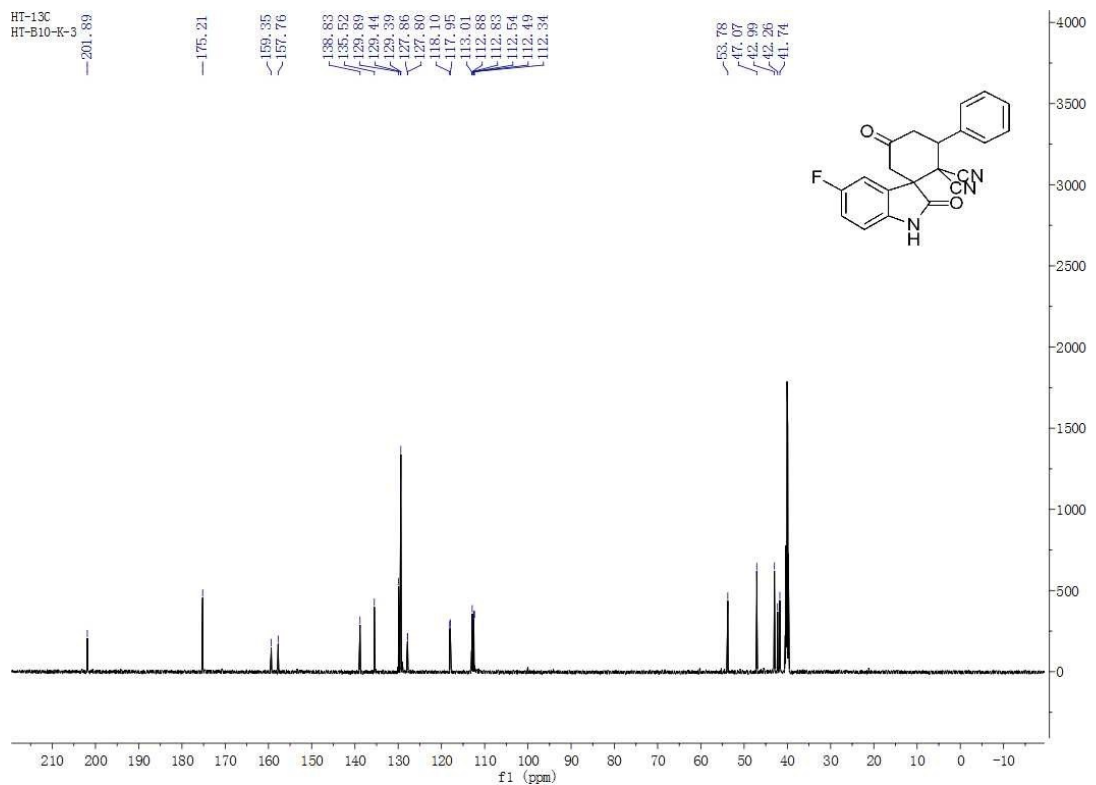

4g

HT-1H  
HT-B10-kuo-6

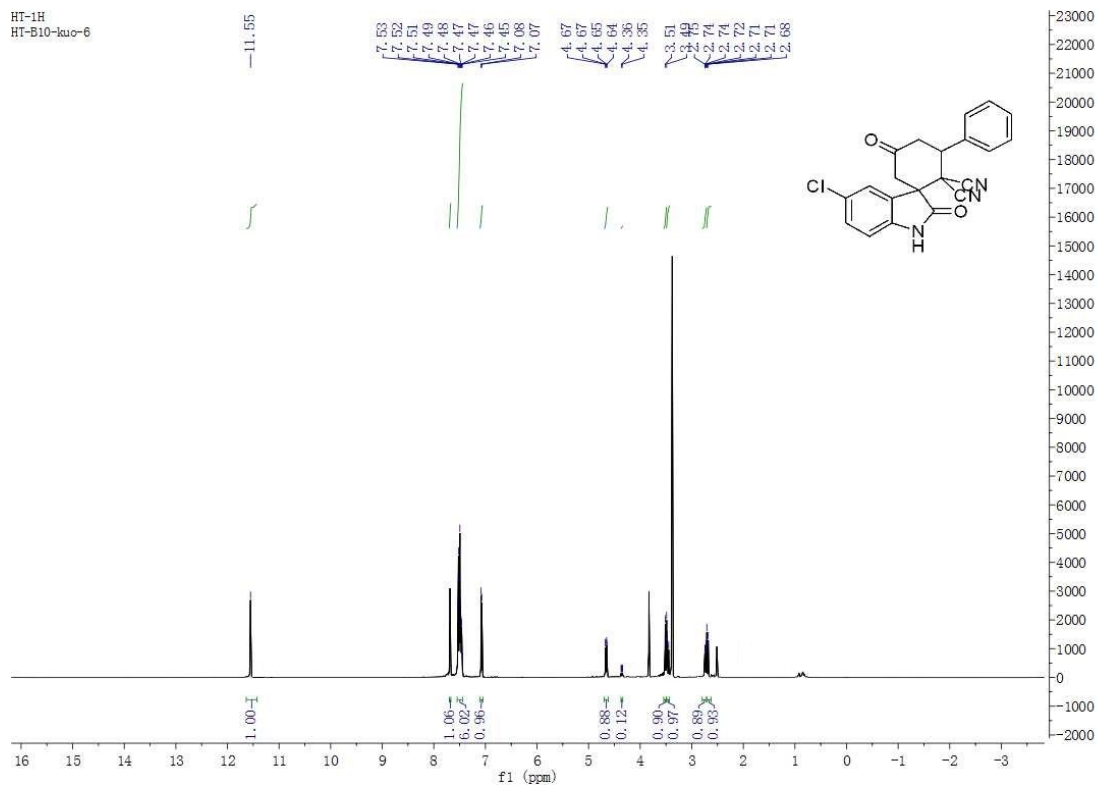

HT-13C  
HT-B10-kuo-6

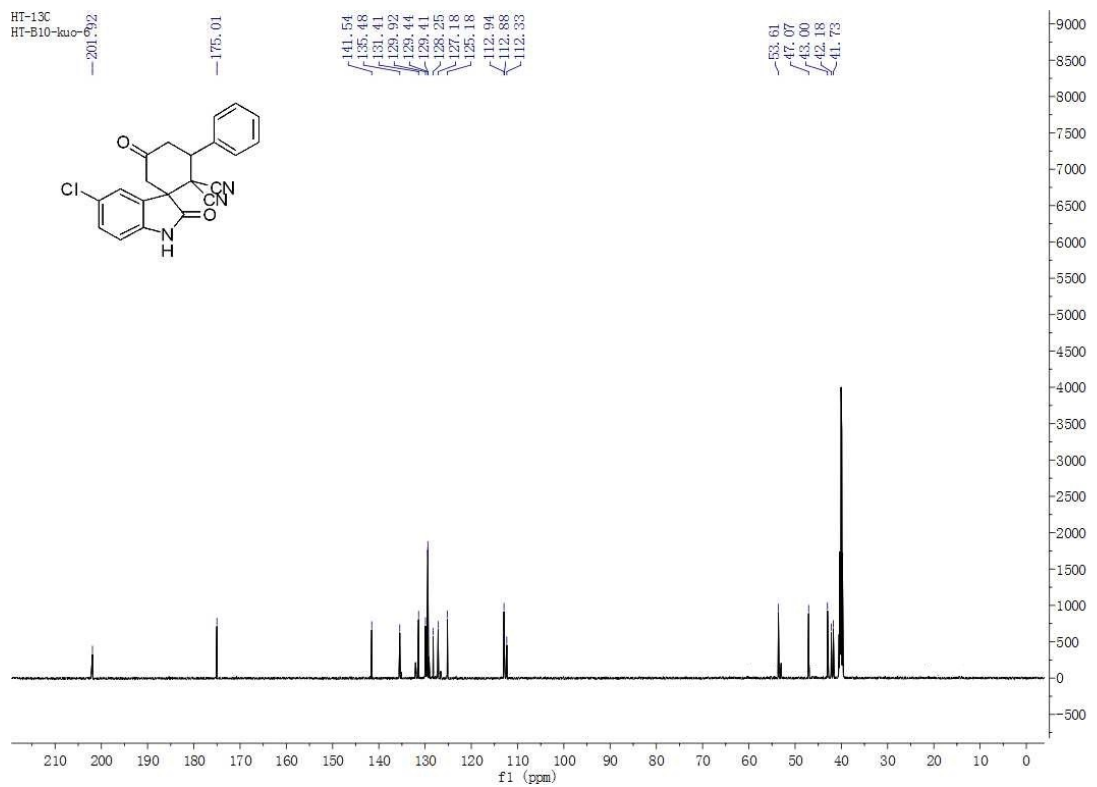



4h

HT-1H  
HT-B10-K-15

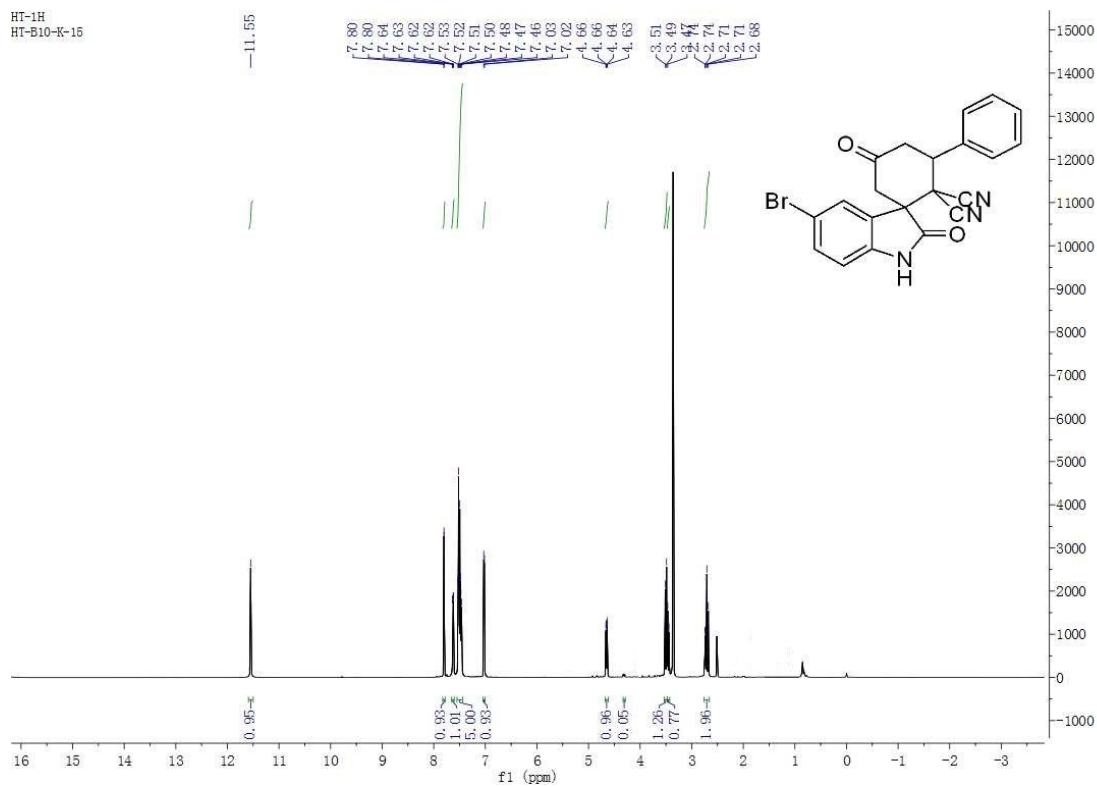

HT-13C  
HT-B10-K-15

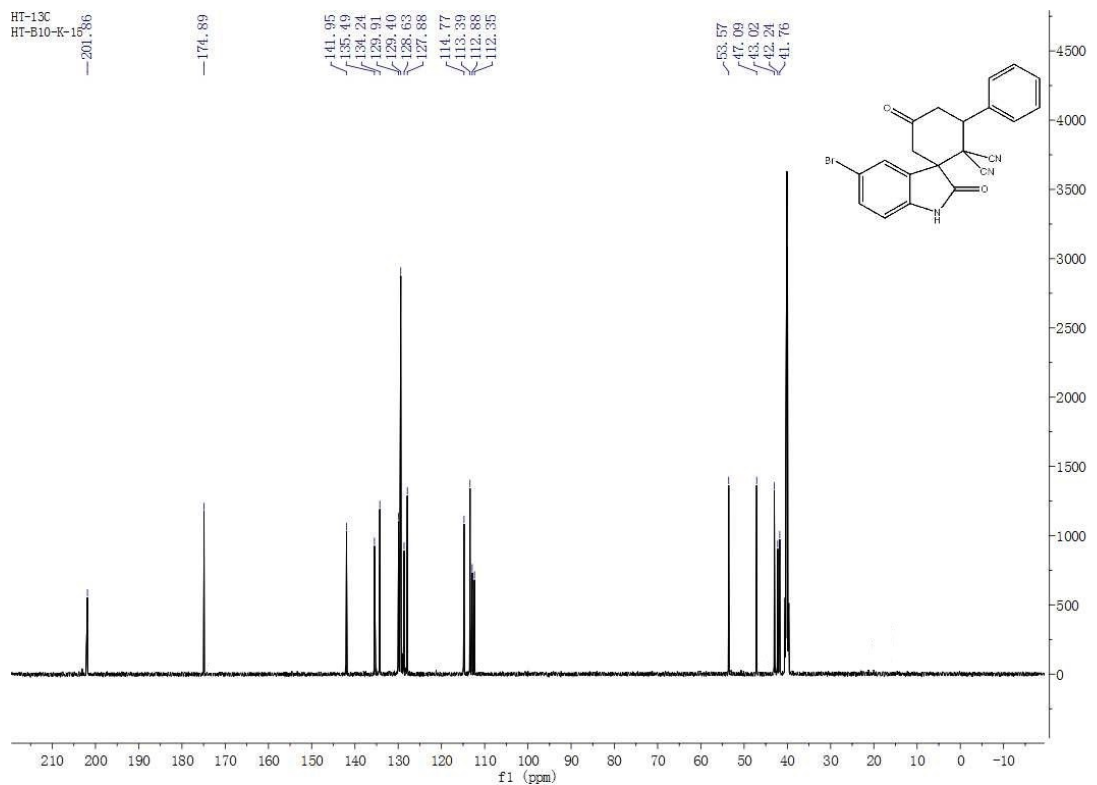

4i

HT-1H  
HT-B10-K-7

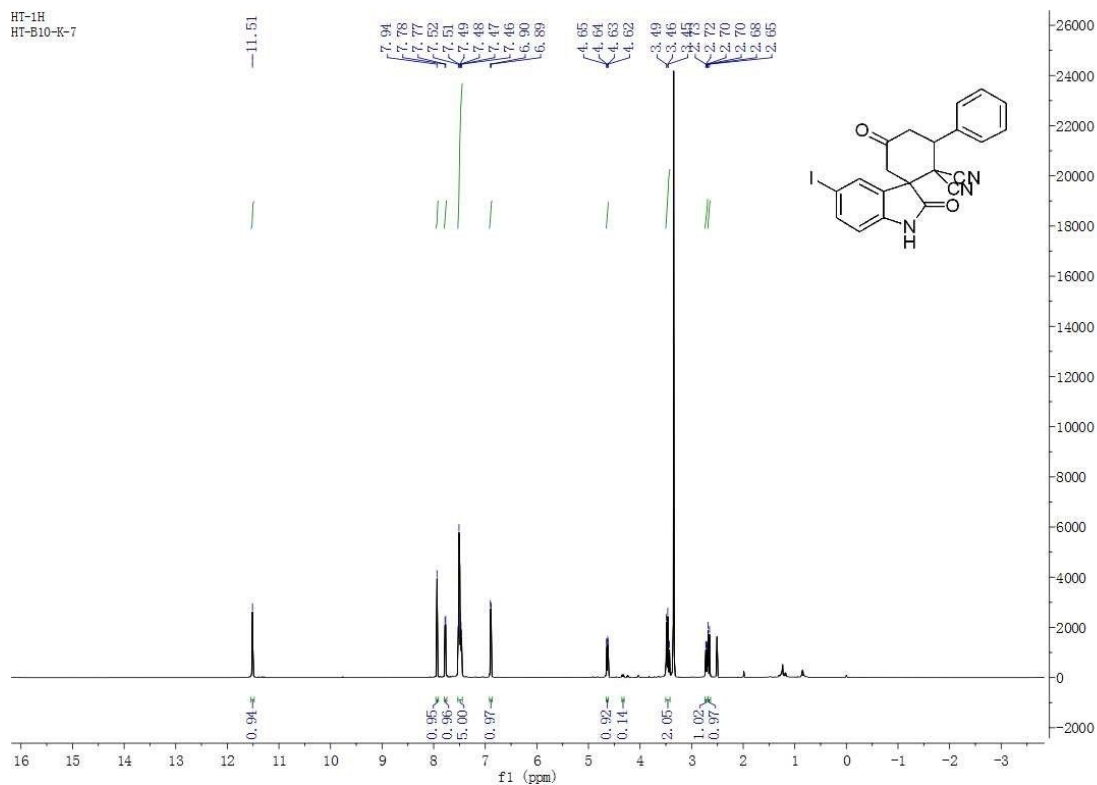

HT-13C  
HT-B10-K-7

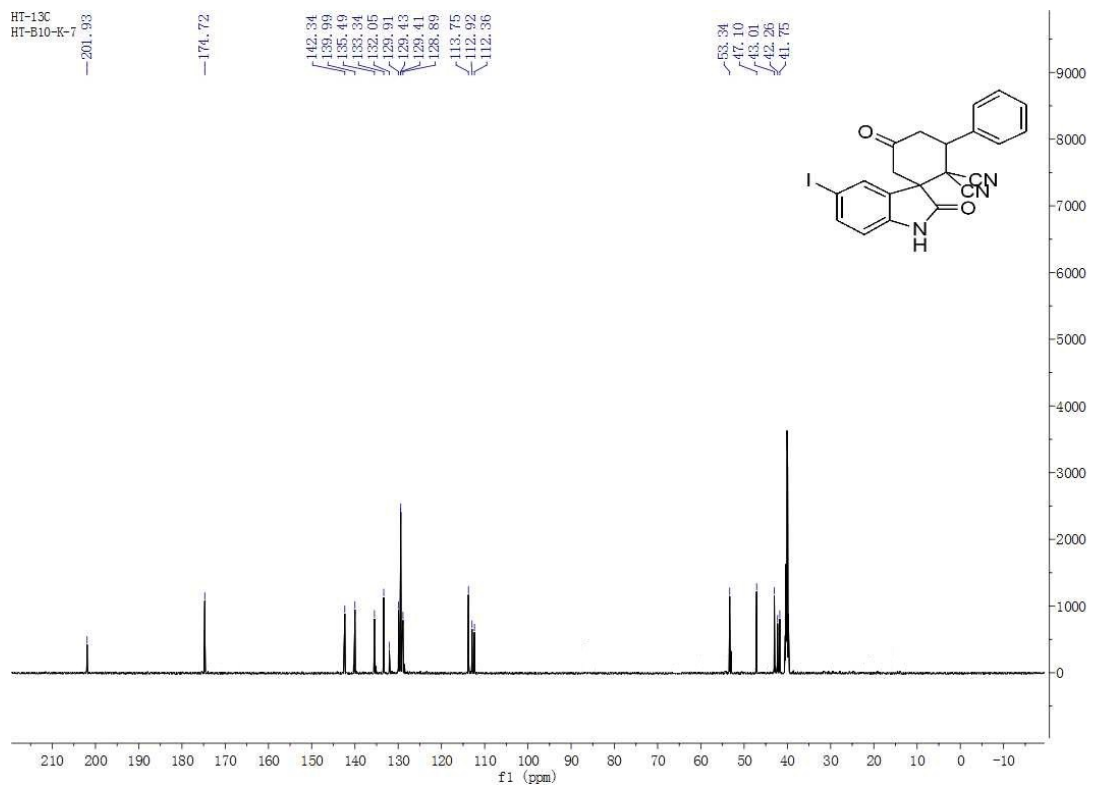

4j

HT-1H  
HT-B10-K-2

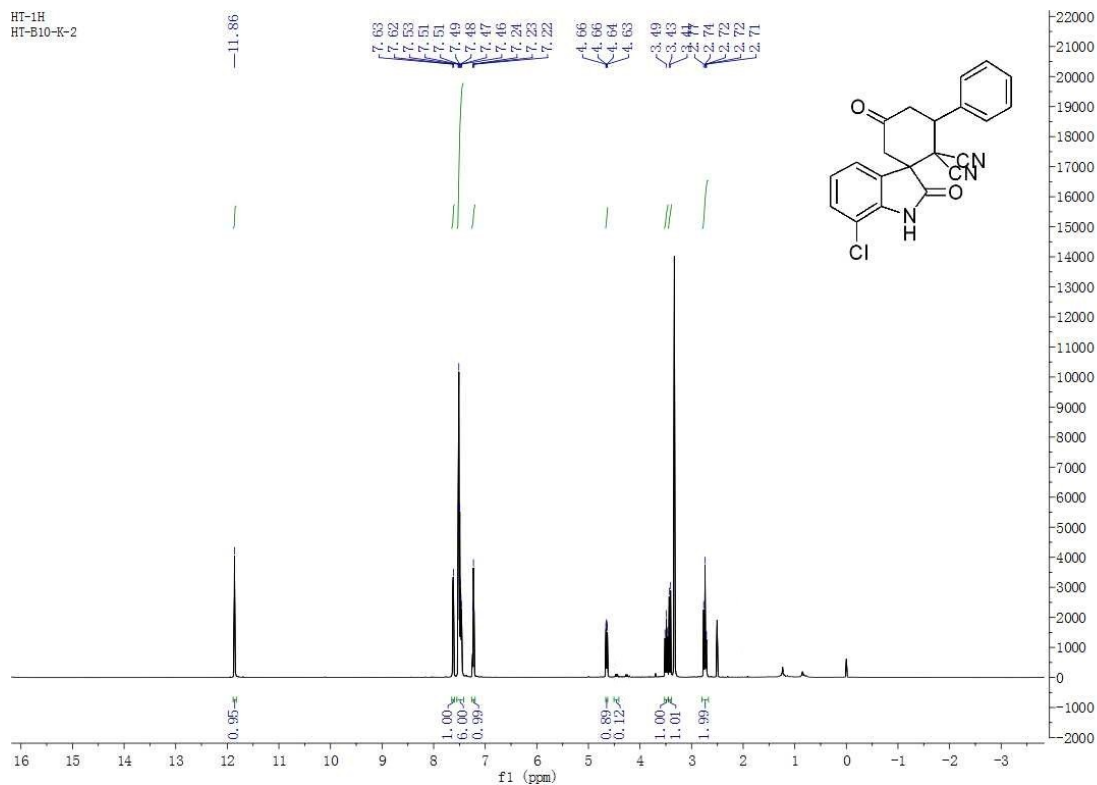

HT-13C  
HT-B10-K-2

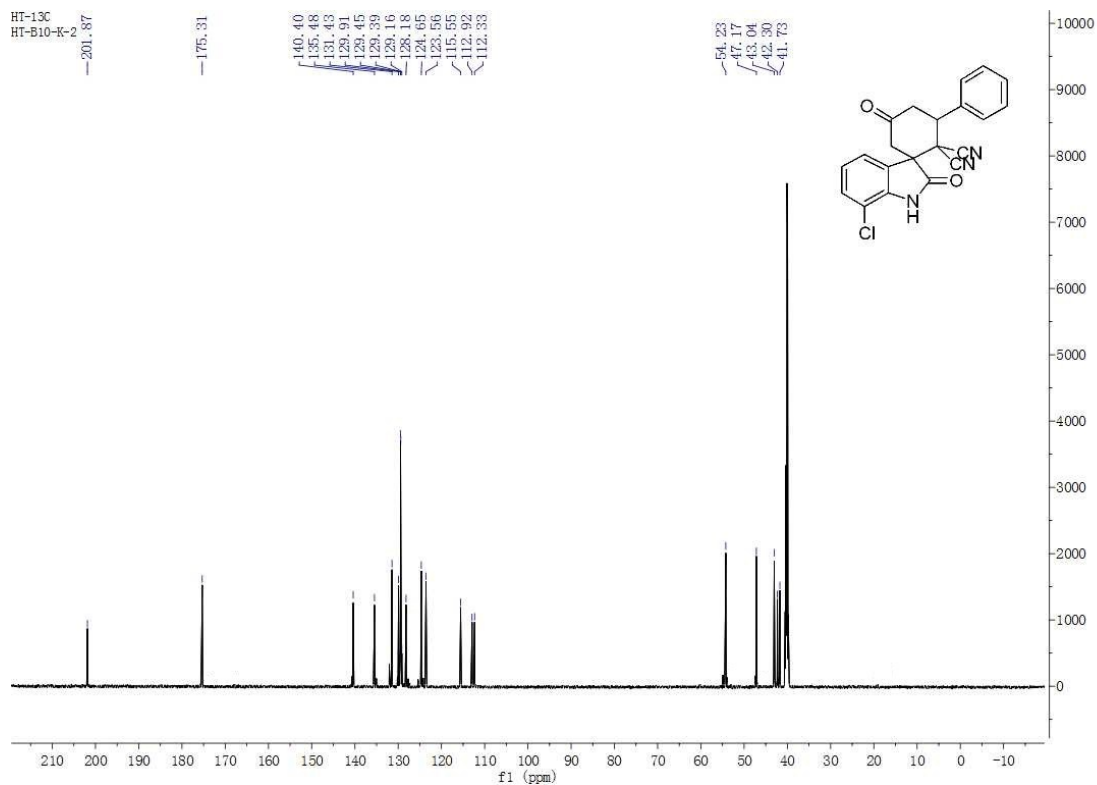

4k

HT-1H  
HT-B10-K-19

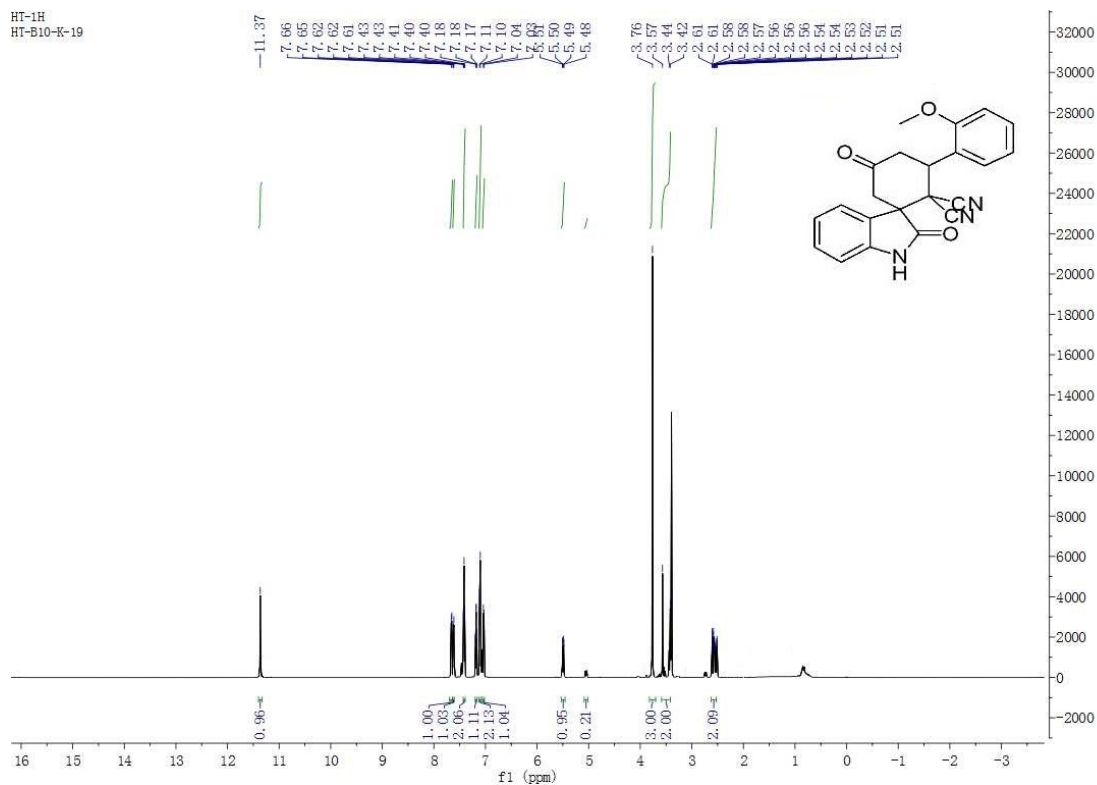

HT-13C  
HT-B10-K-19

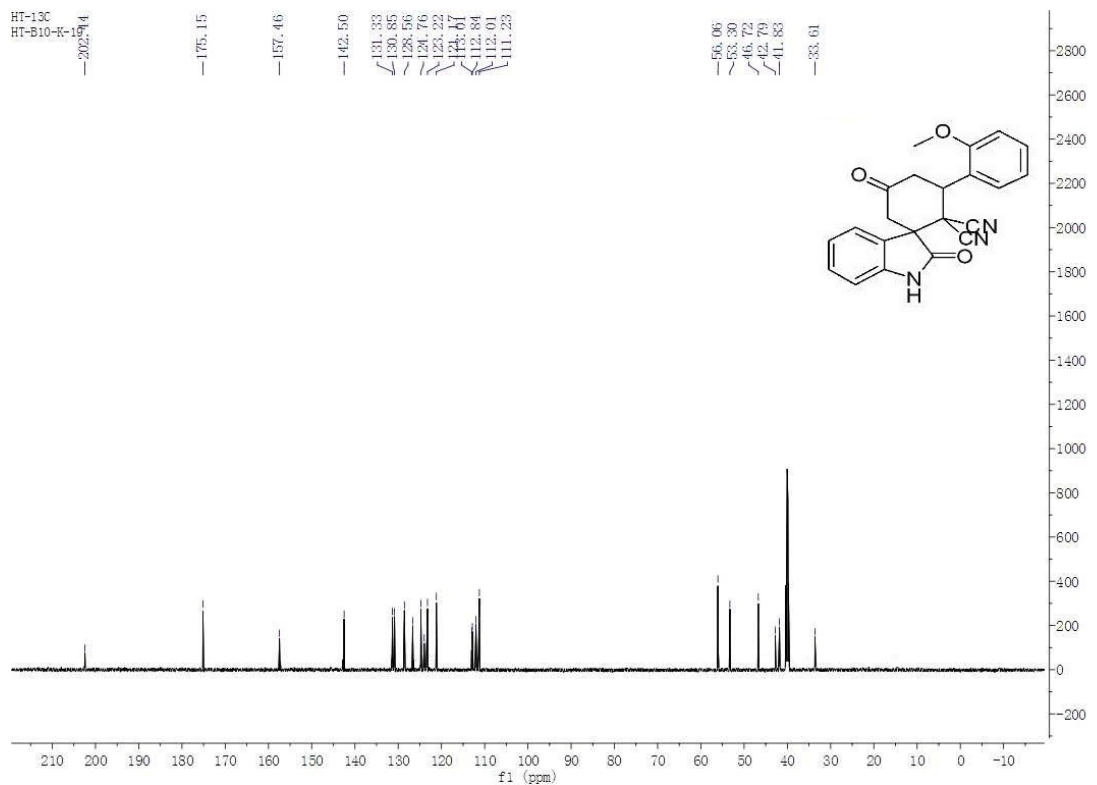

41

HT-1H  
HT-B10-k-12

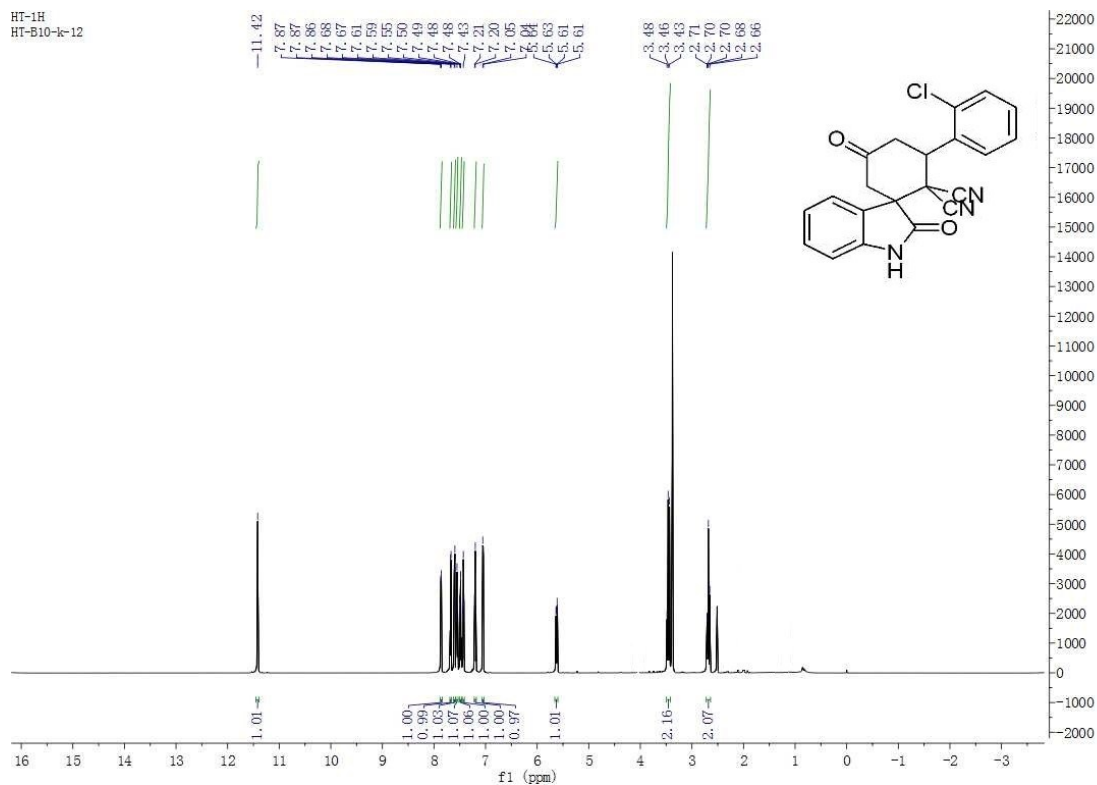

HT-13C  
HT-B10-k-12

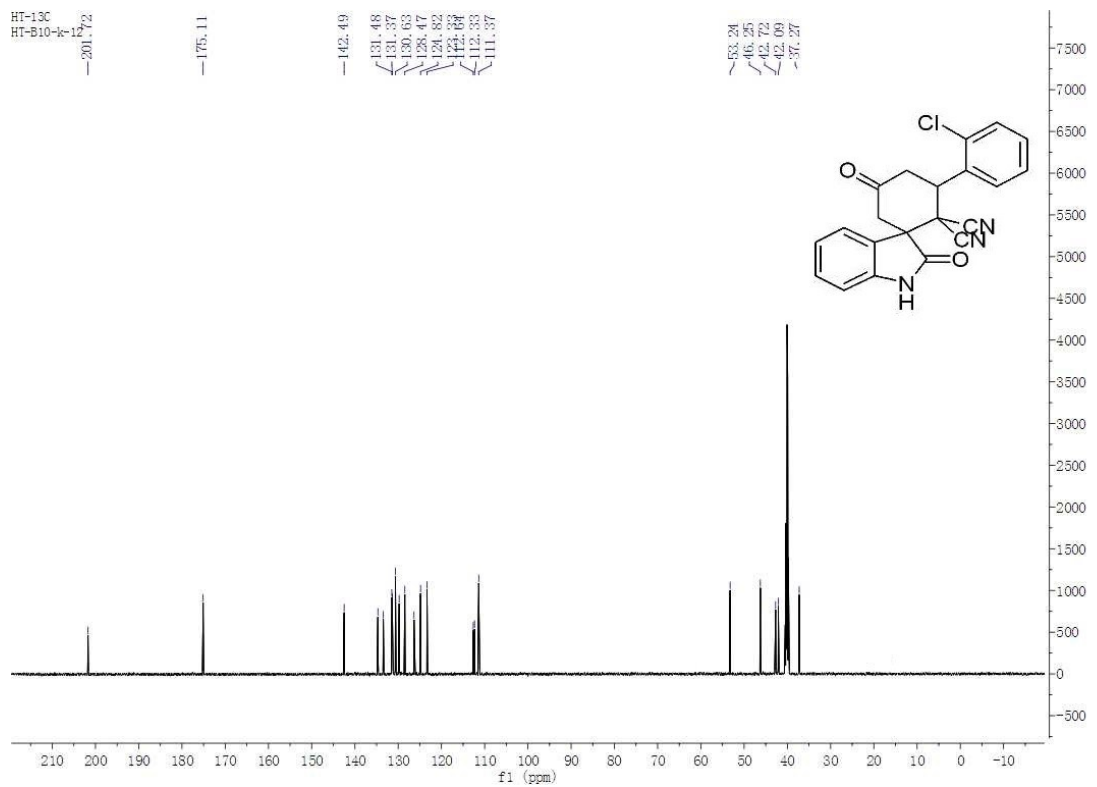

4m

HT-1H  
HT-B10-K-14

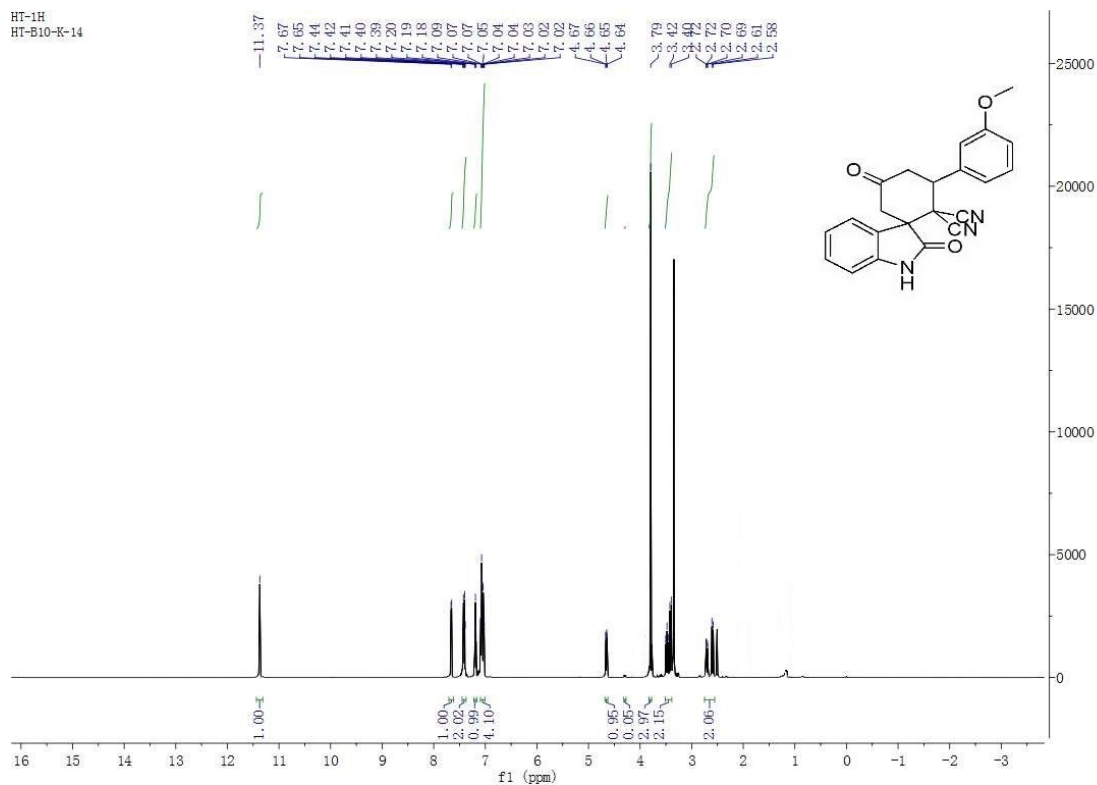

HT-13C  
HT-B10-K-146

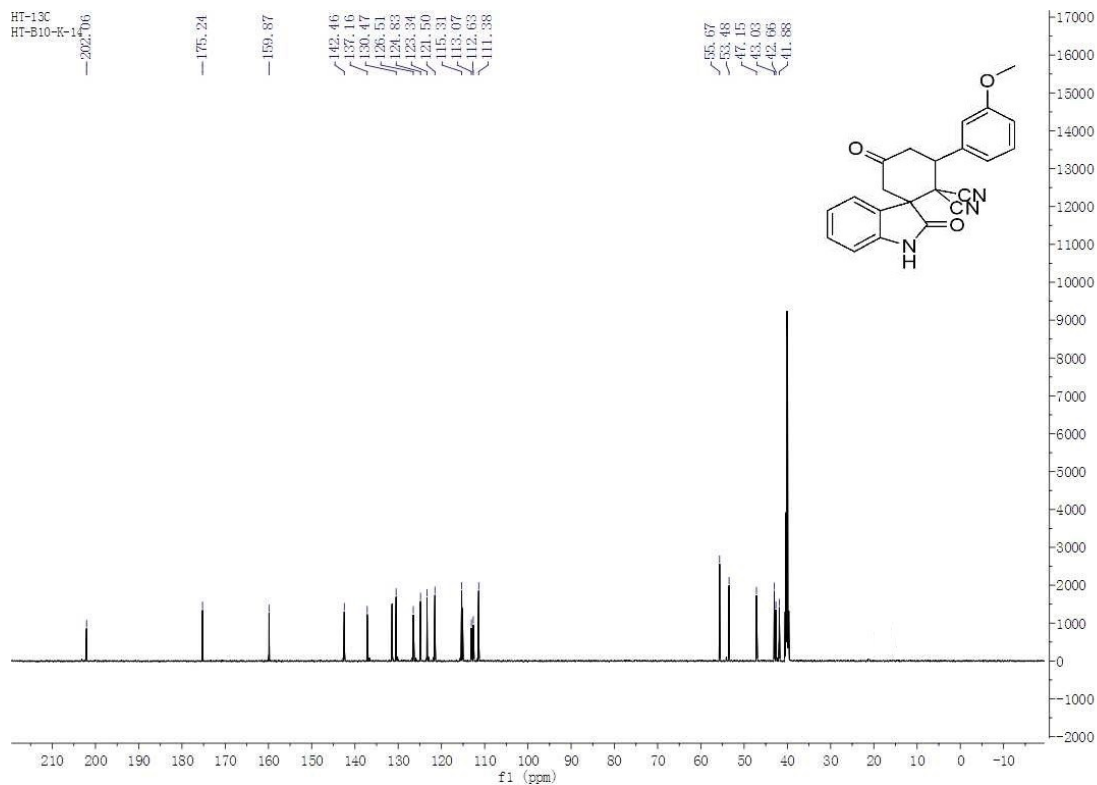



4o

HT-1H  
HT-B10-K-11

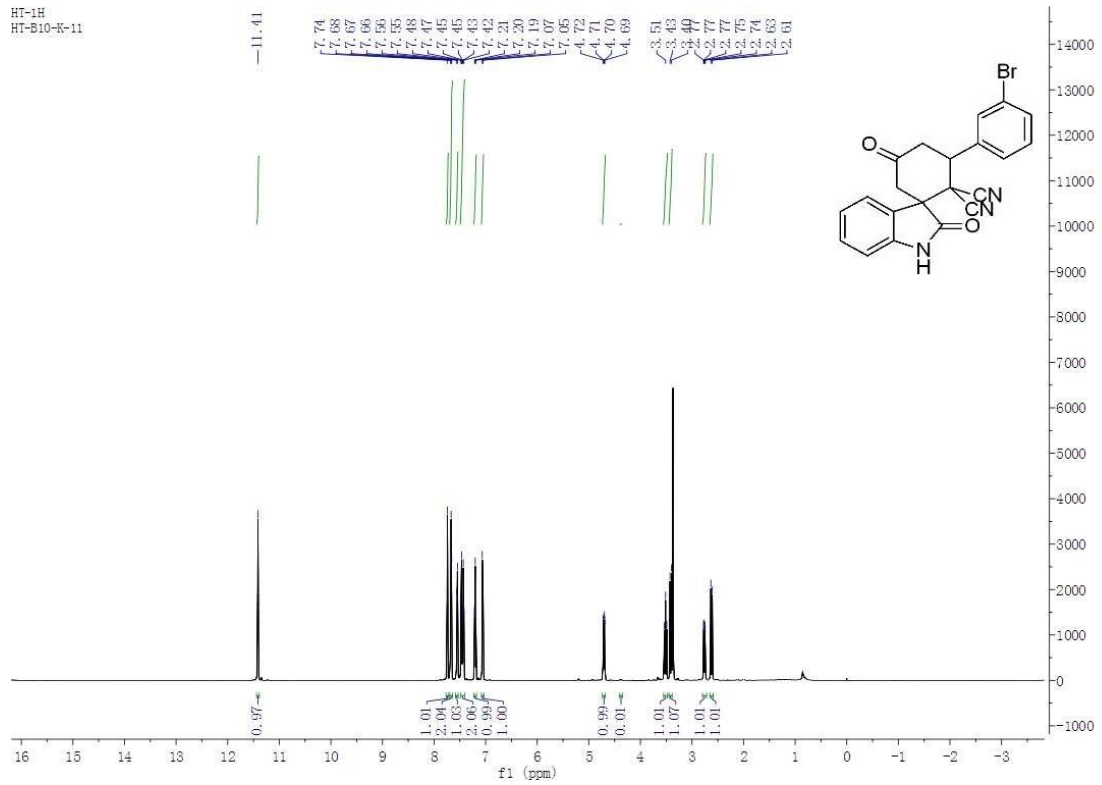

HT-13C  
HT-B10-K-11-82

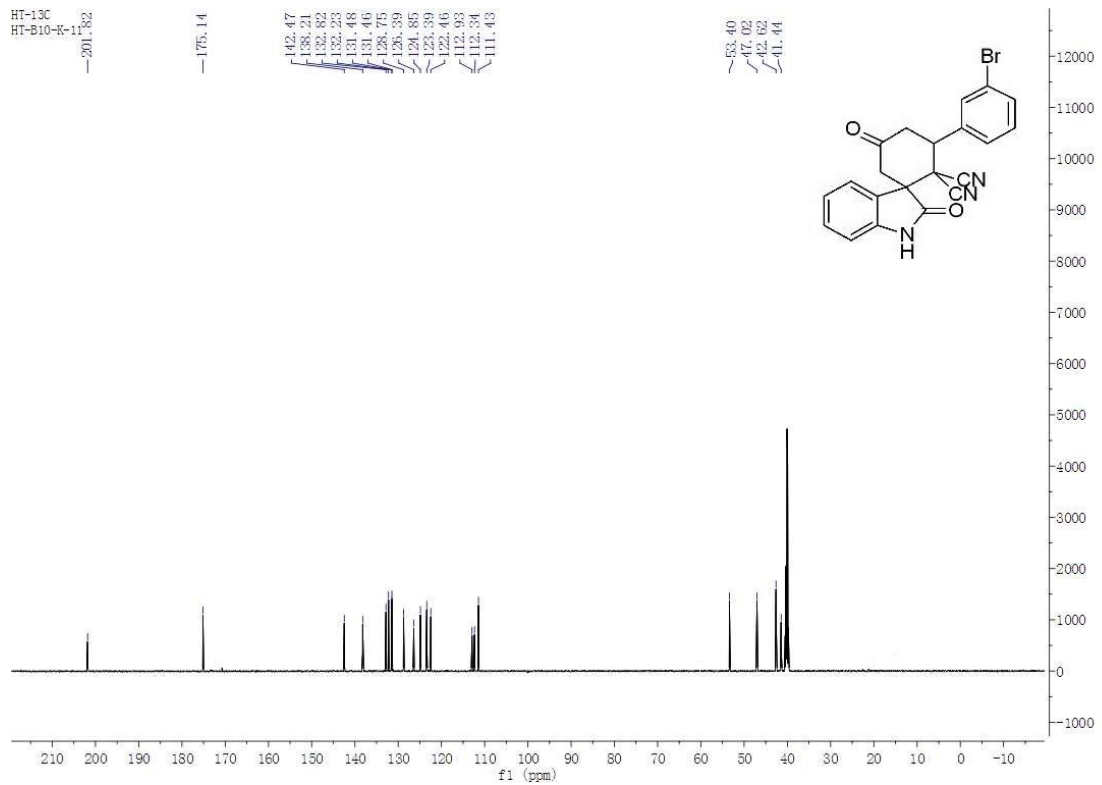



4p

HT-1H  
HT-B10-K-13

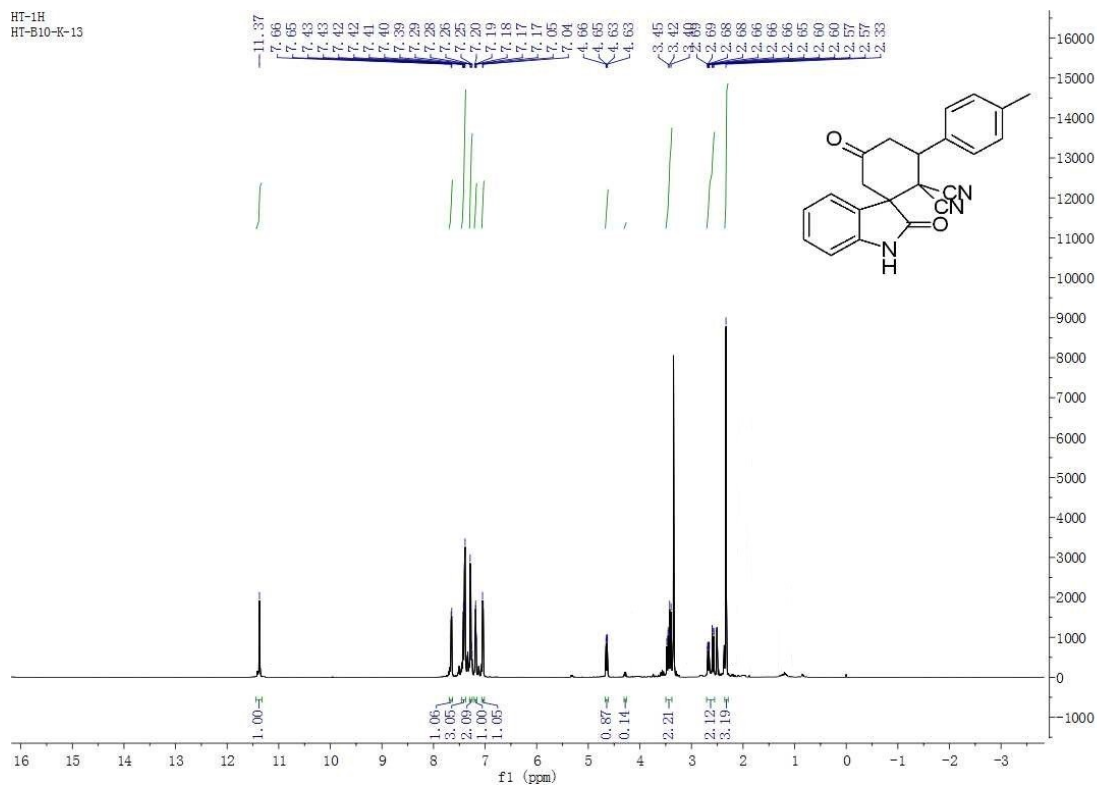

HT-13C  
HT-B10-K-13

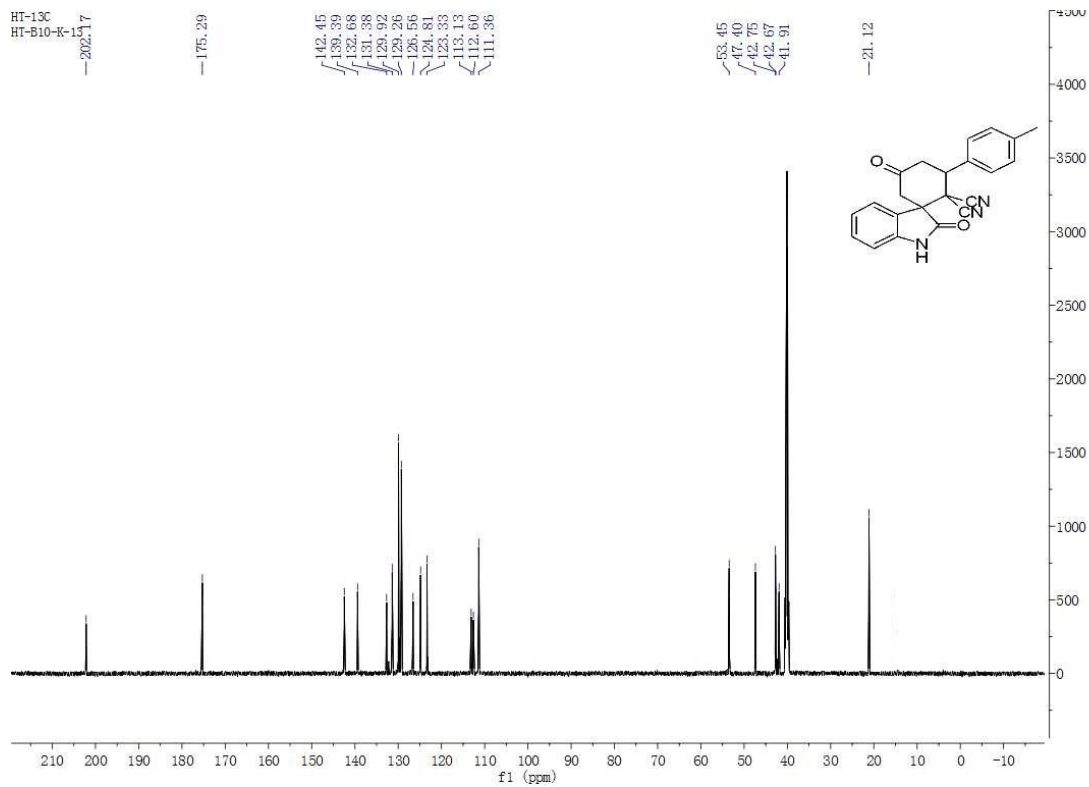

4q

HT-1H  
HT-B10-k-22

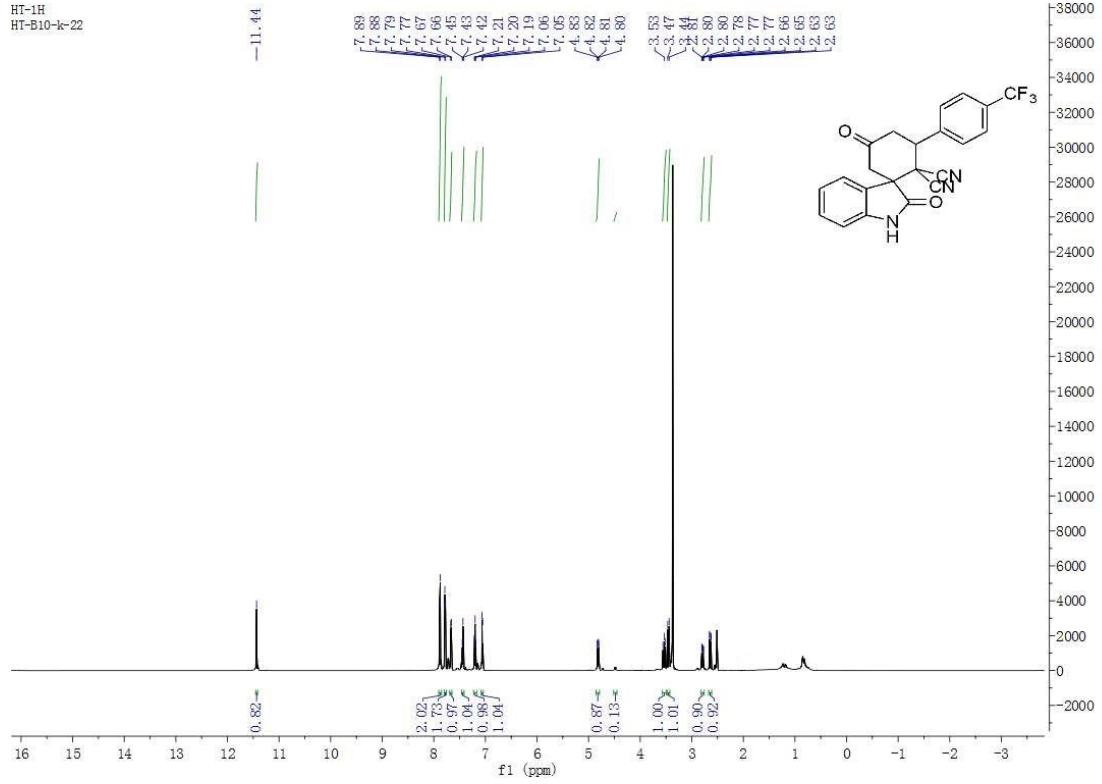

HT-13C  
HT-B10-k-22

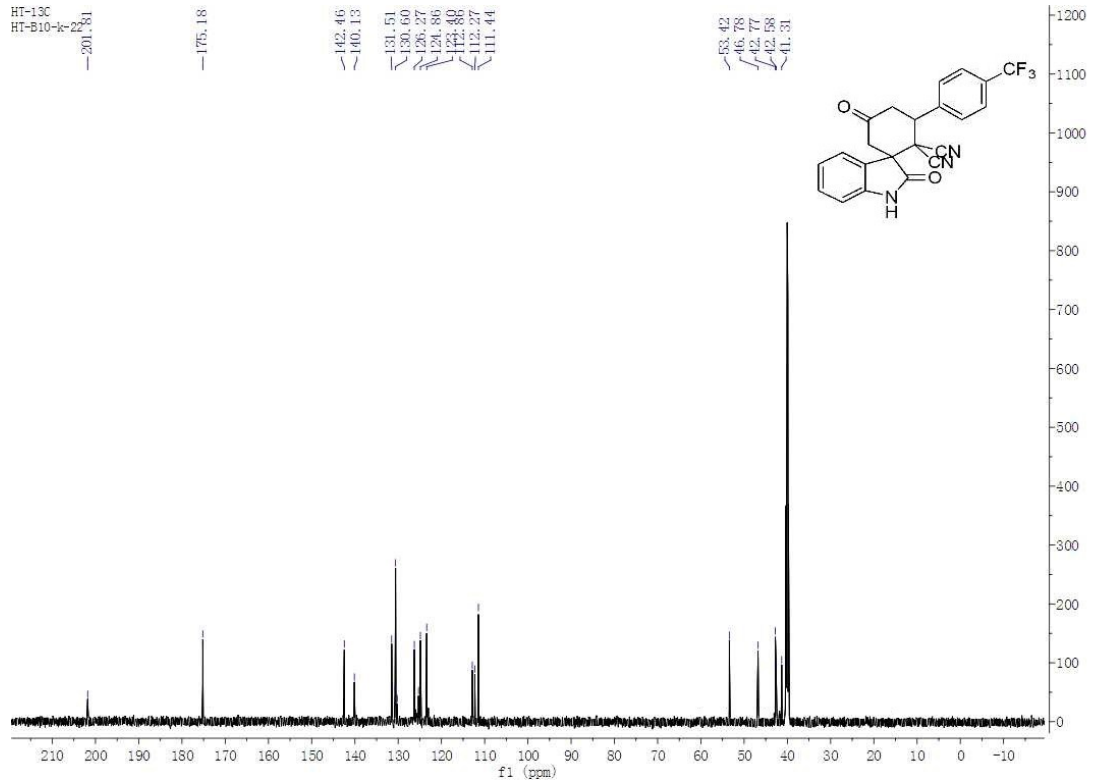

4r

HT-1H  
HT-B10-K-24

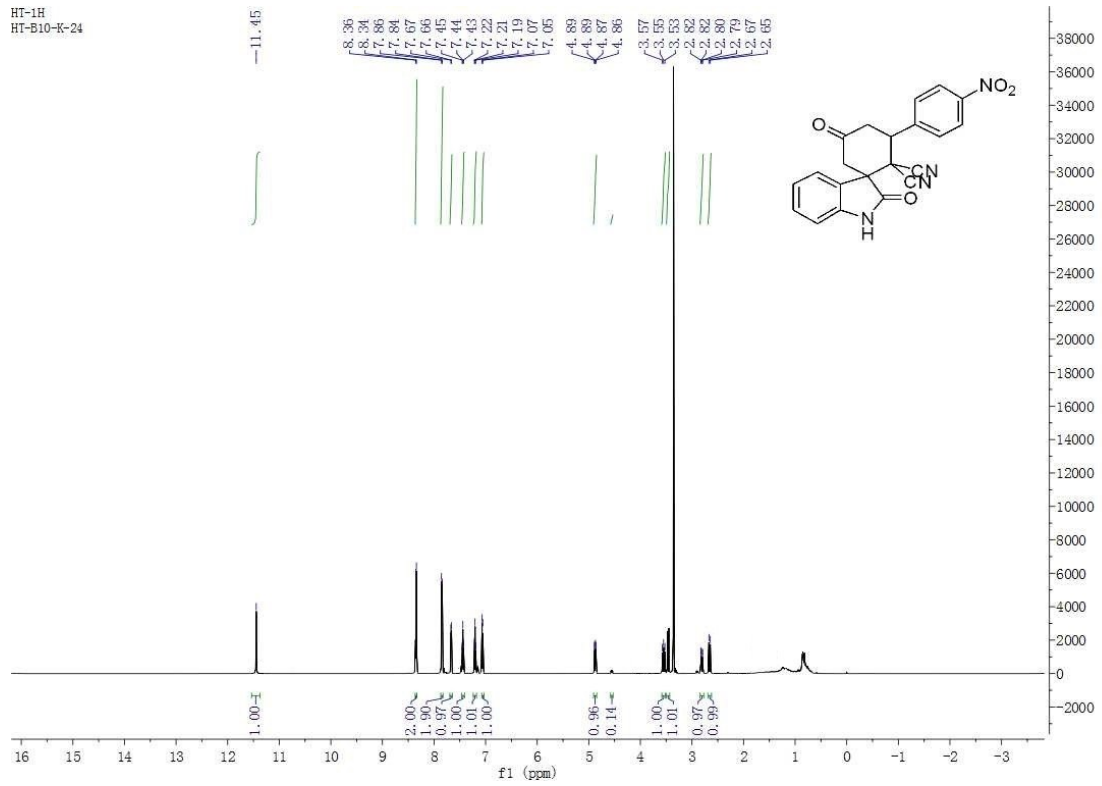

HT-13C  
HT-B10-K-24

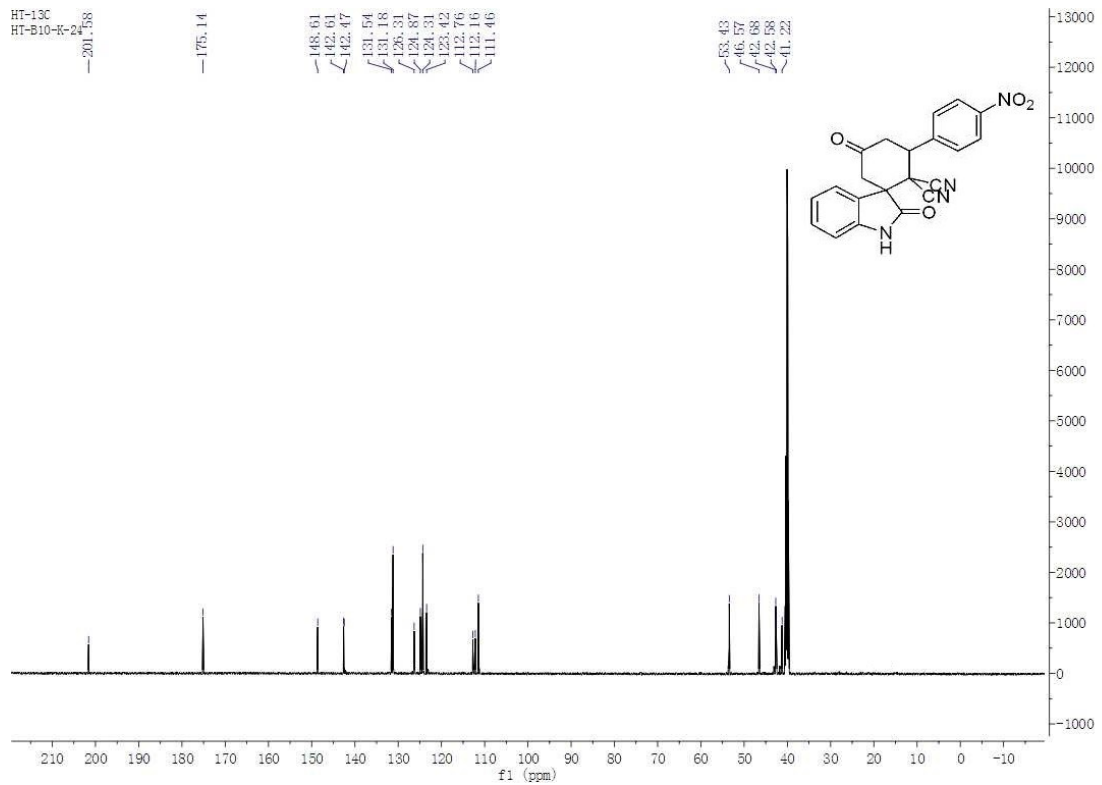

4s

HT-1H  
HT-B10-K-23

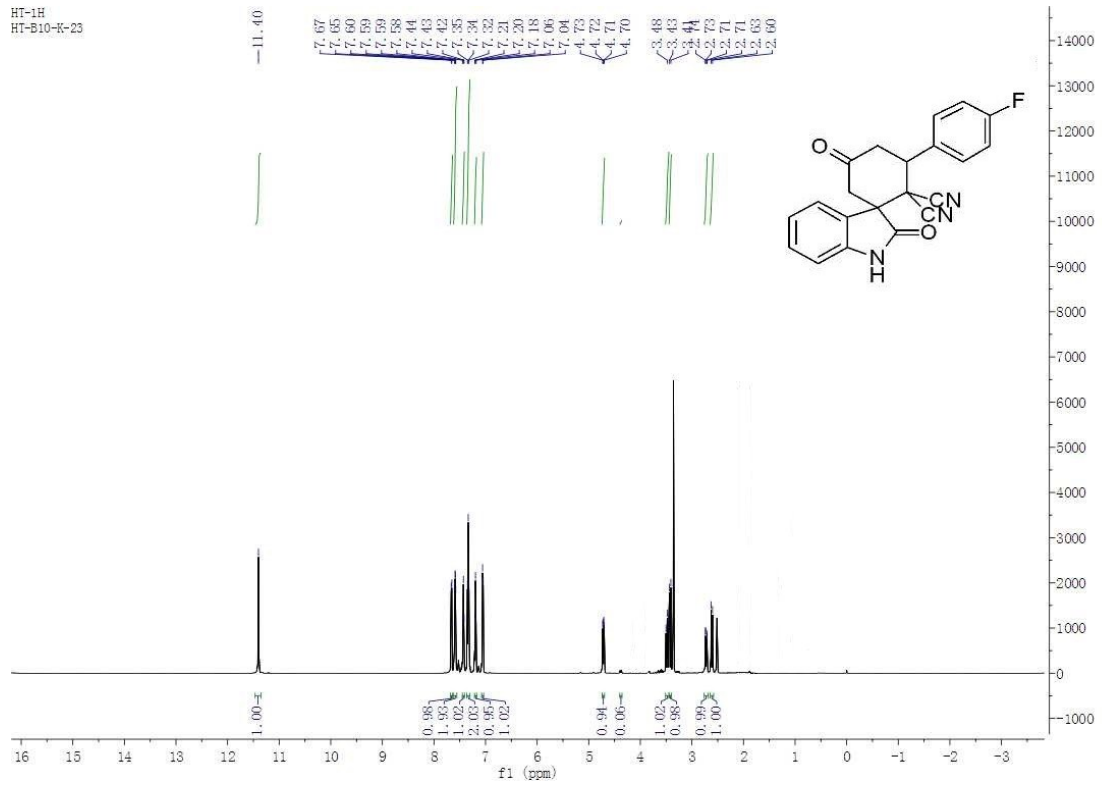

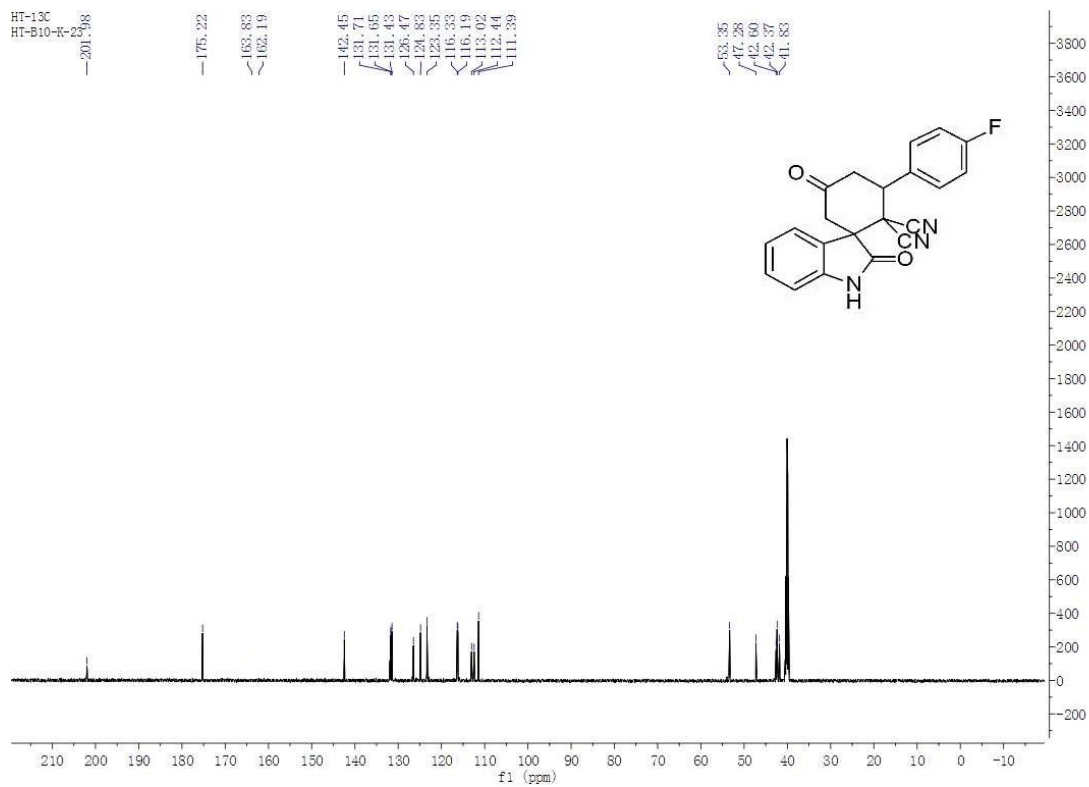

4t

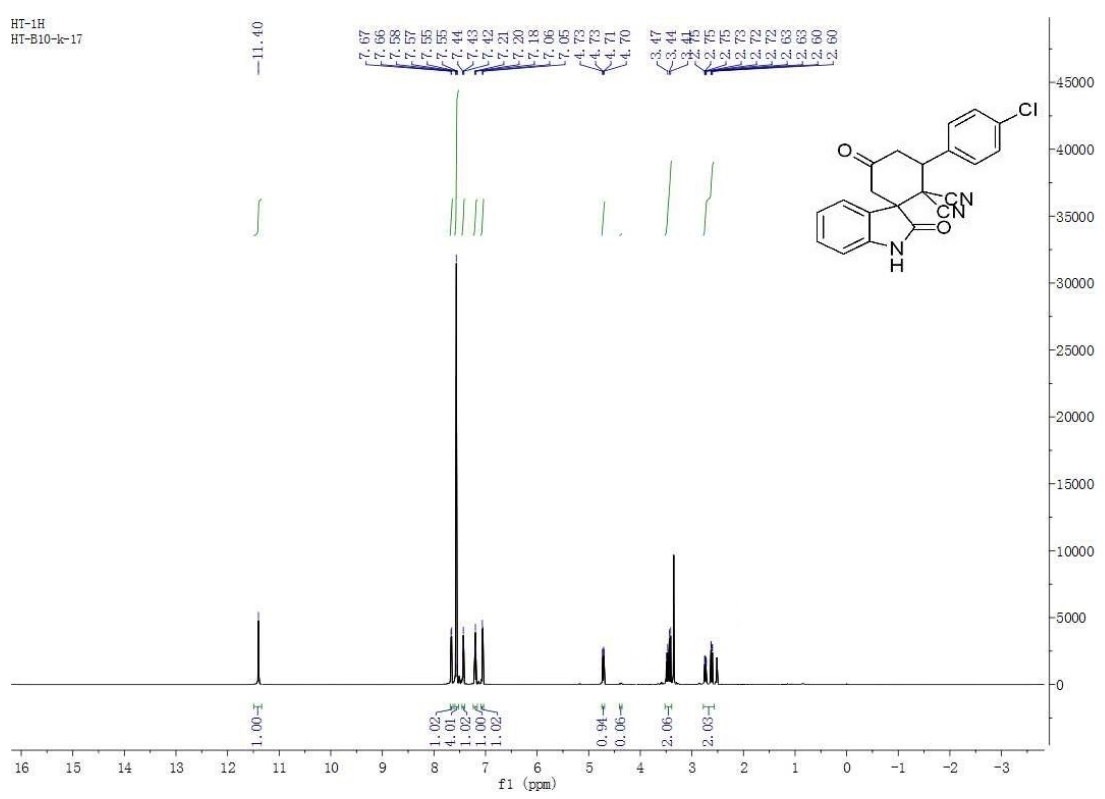

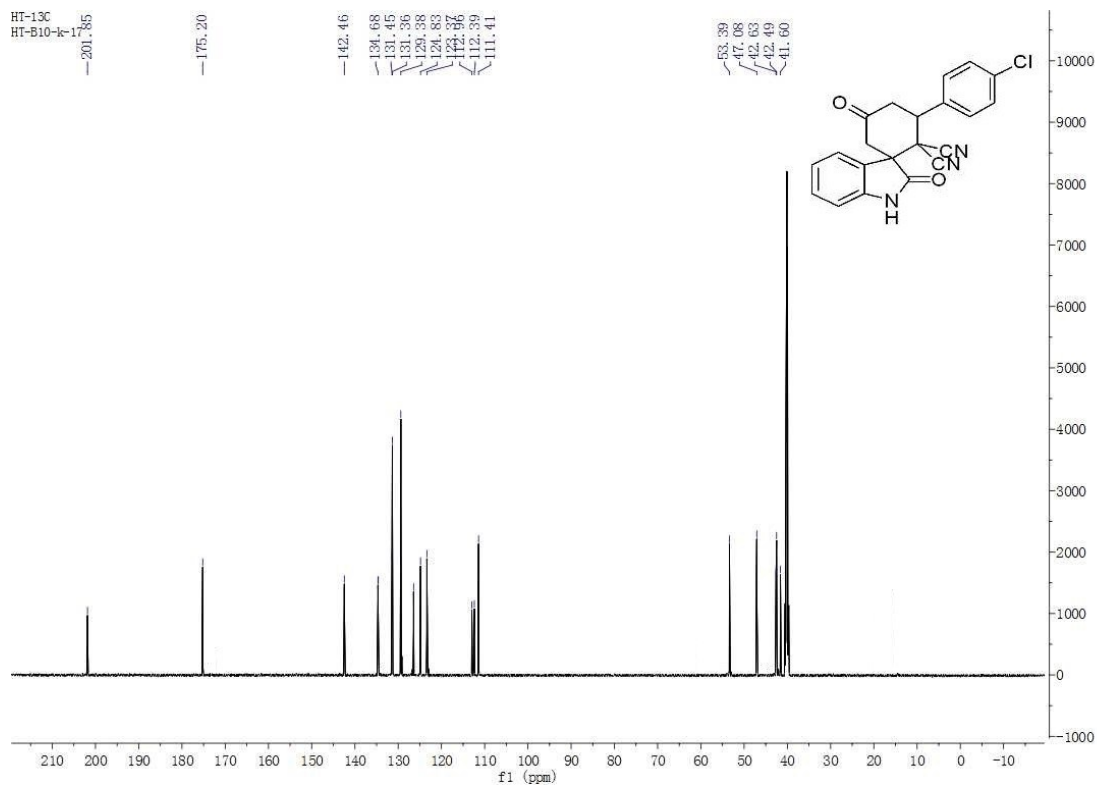

4u



4v

HT-1H  
HT-B10-K-25

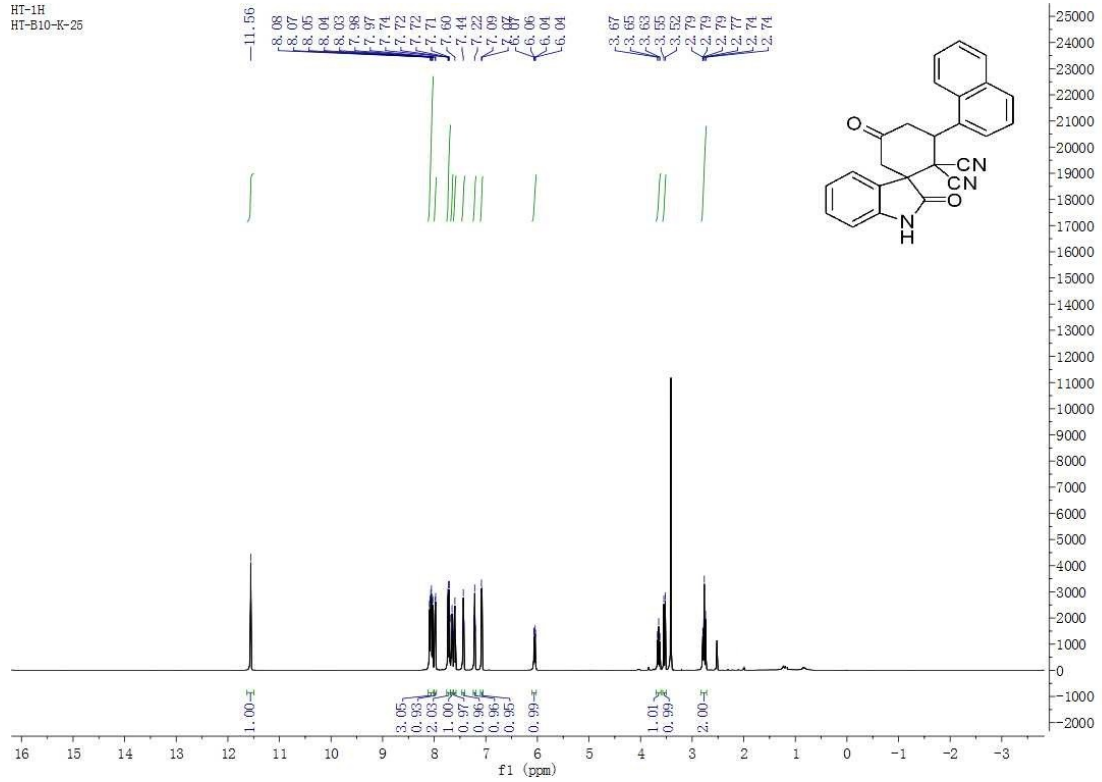

HT-13C  
HT-B10-K-25

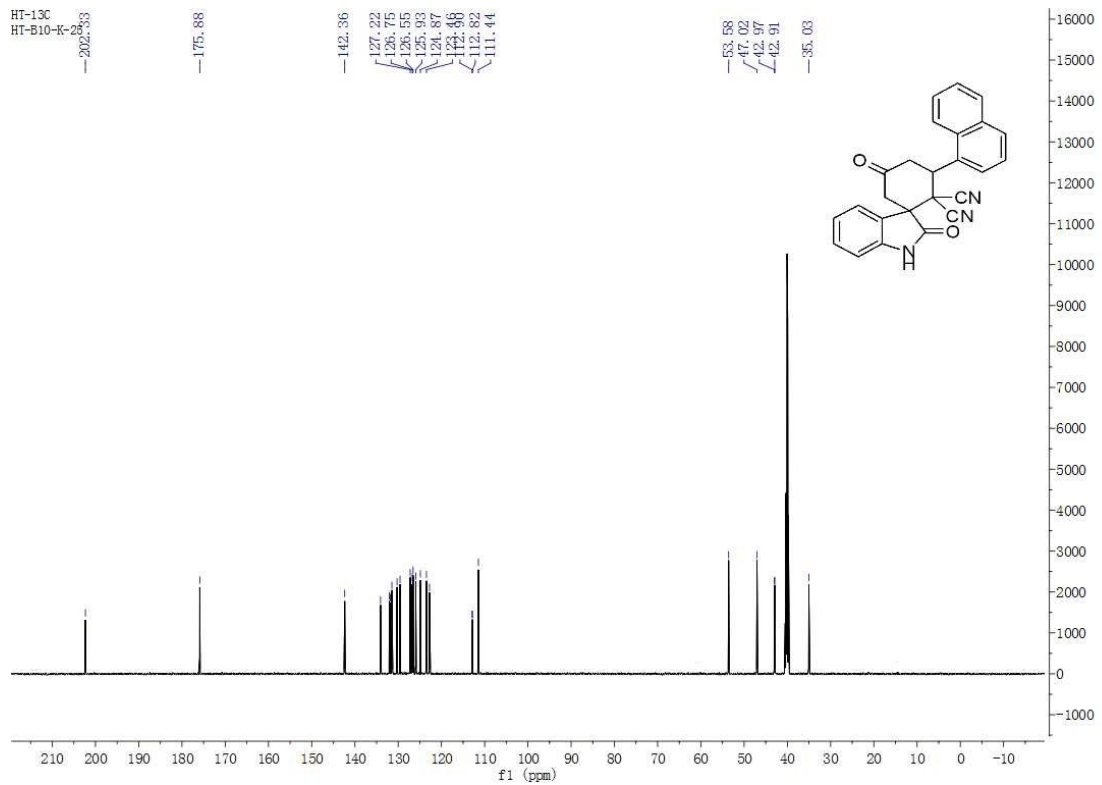



4w

HT-1H  
HT-B10-K-26

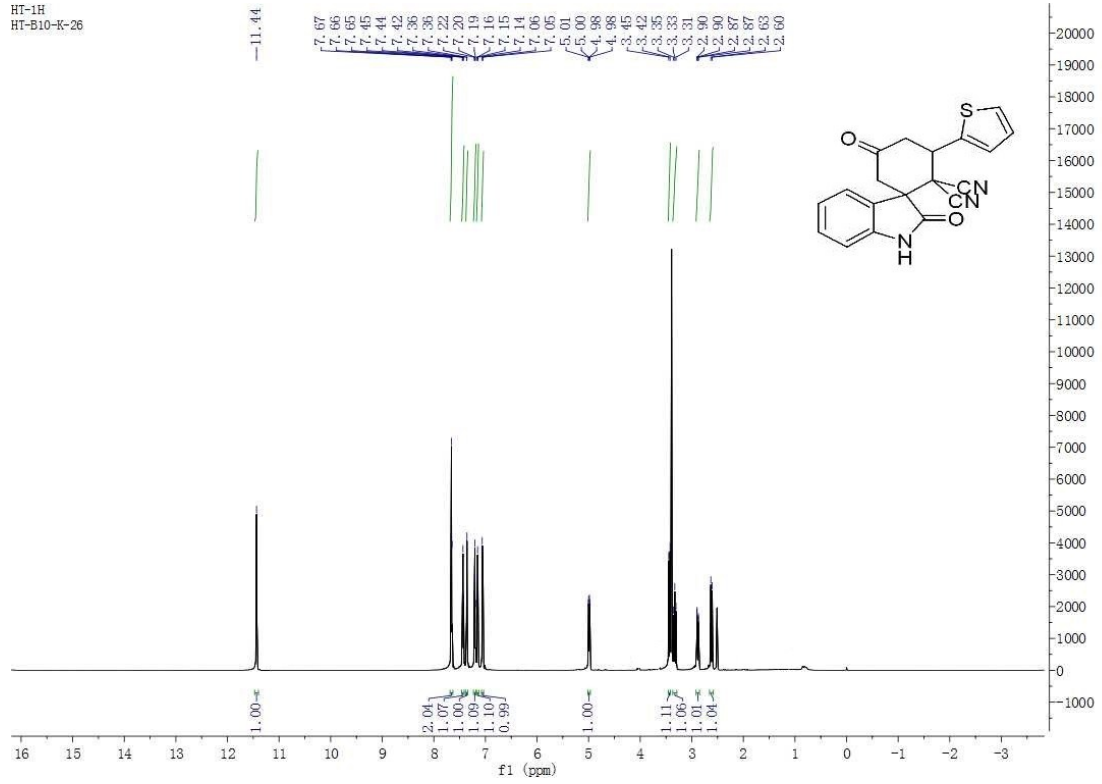

HT-13C  
HT-B10-K-26

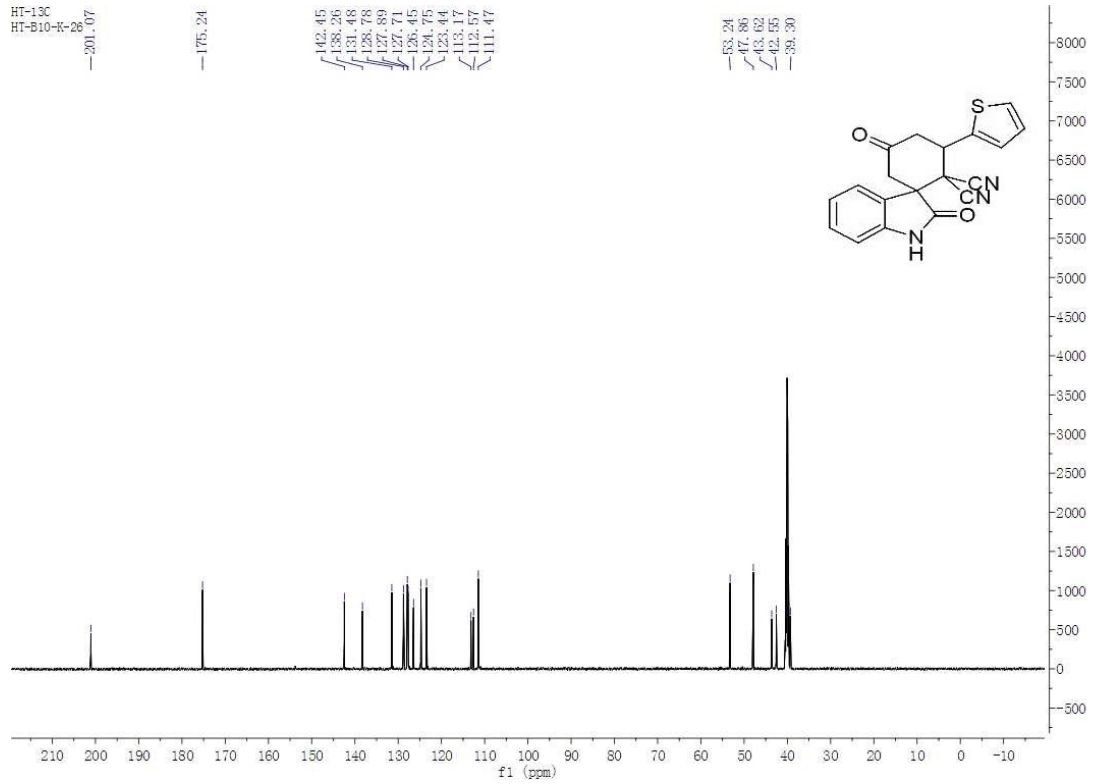

4x

HT-1H  
HT-B10-K-28

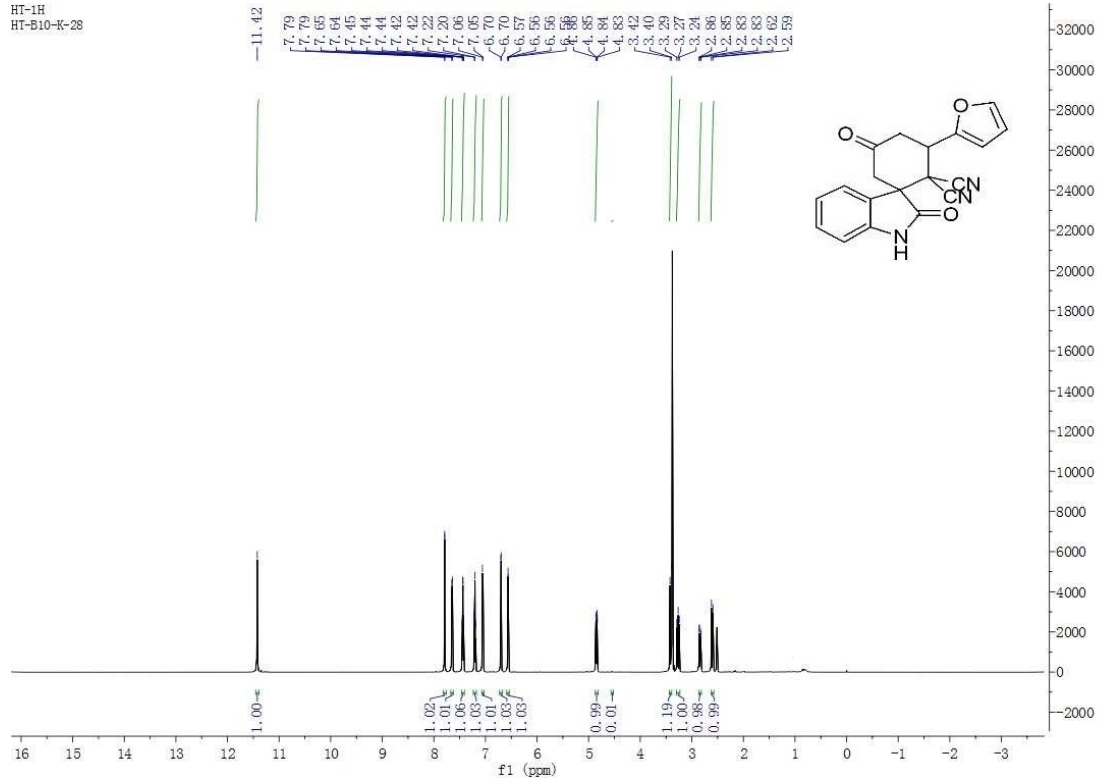

HT-13C  
HT-B10-K-28

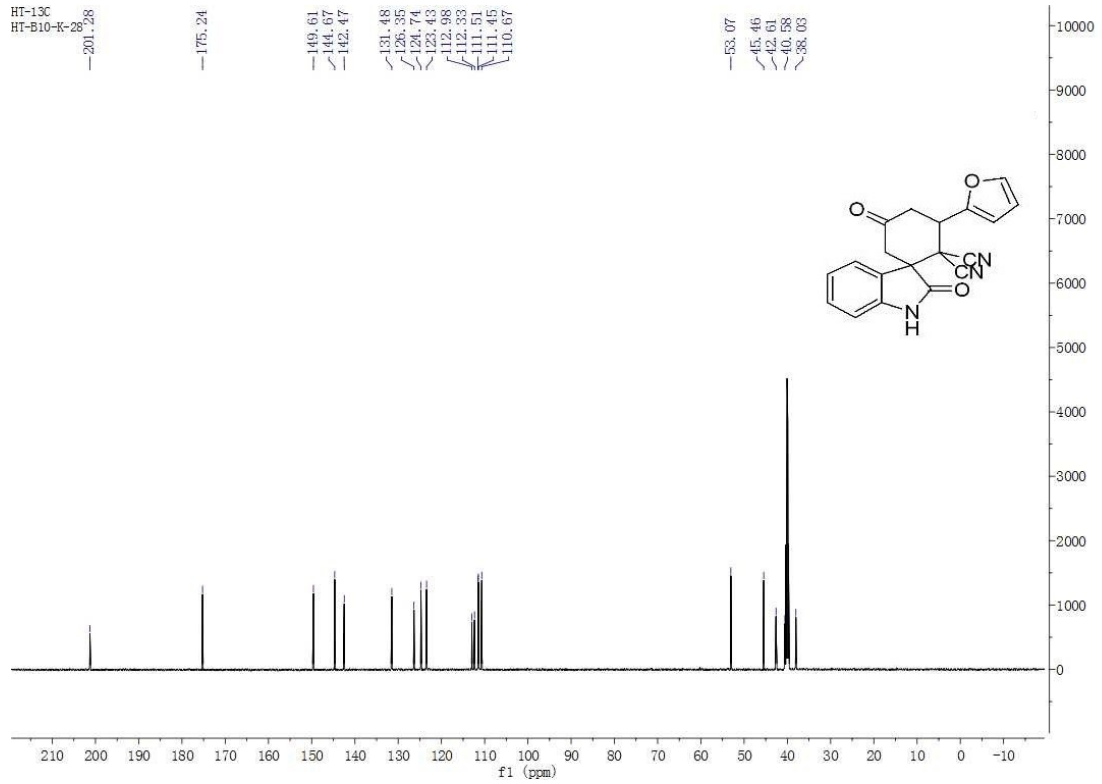

4y

HT-1H  
HT-B10-K-27

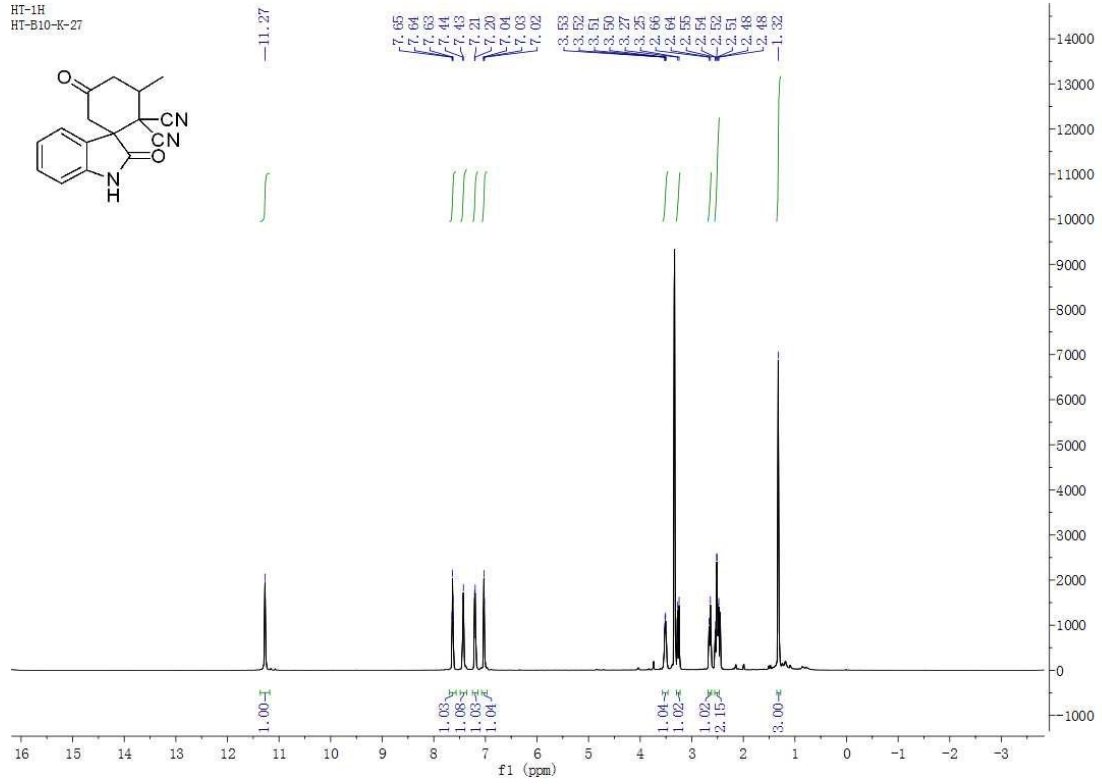

HT-13C  
HT-B10-K-27

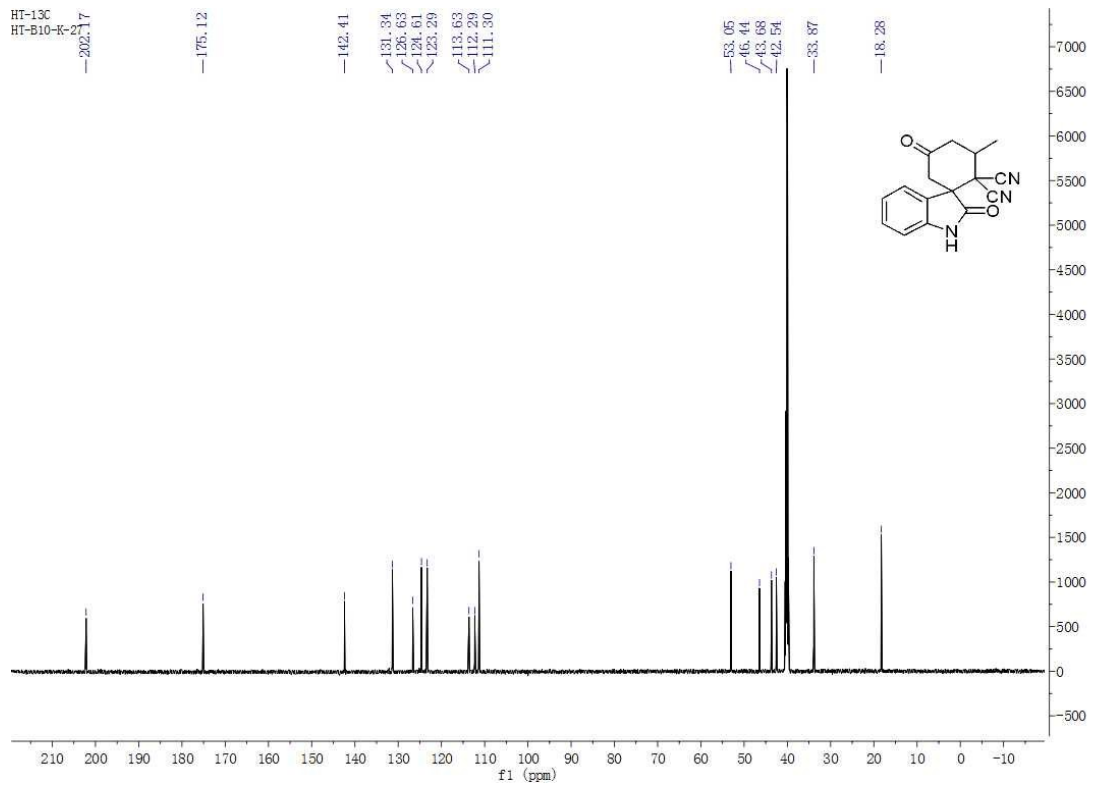

4z

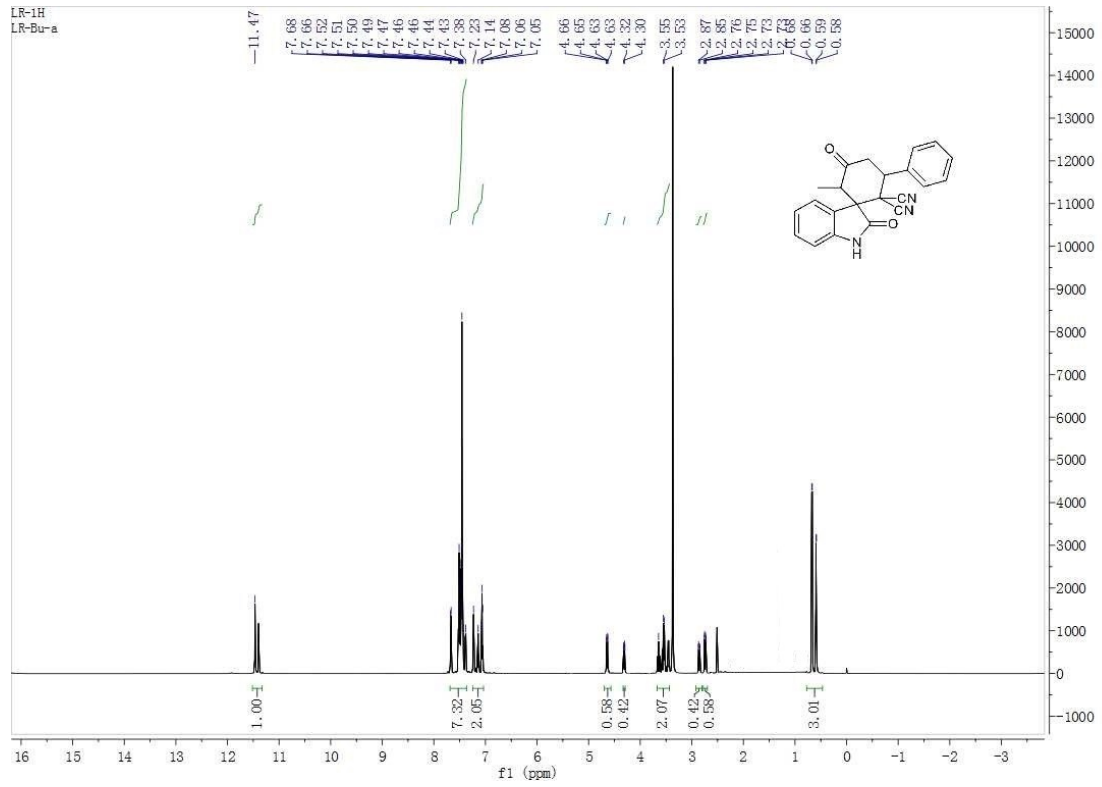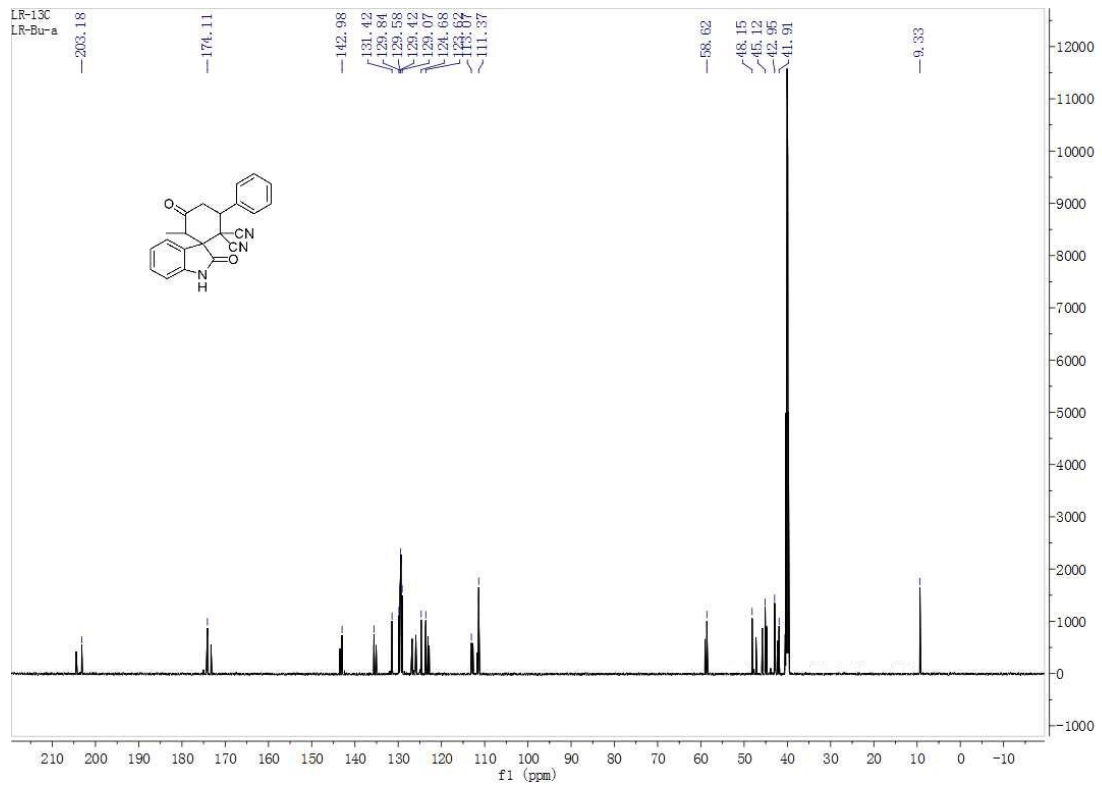

4aa

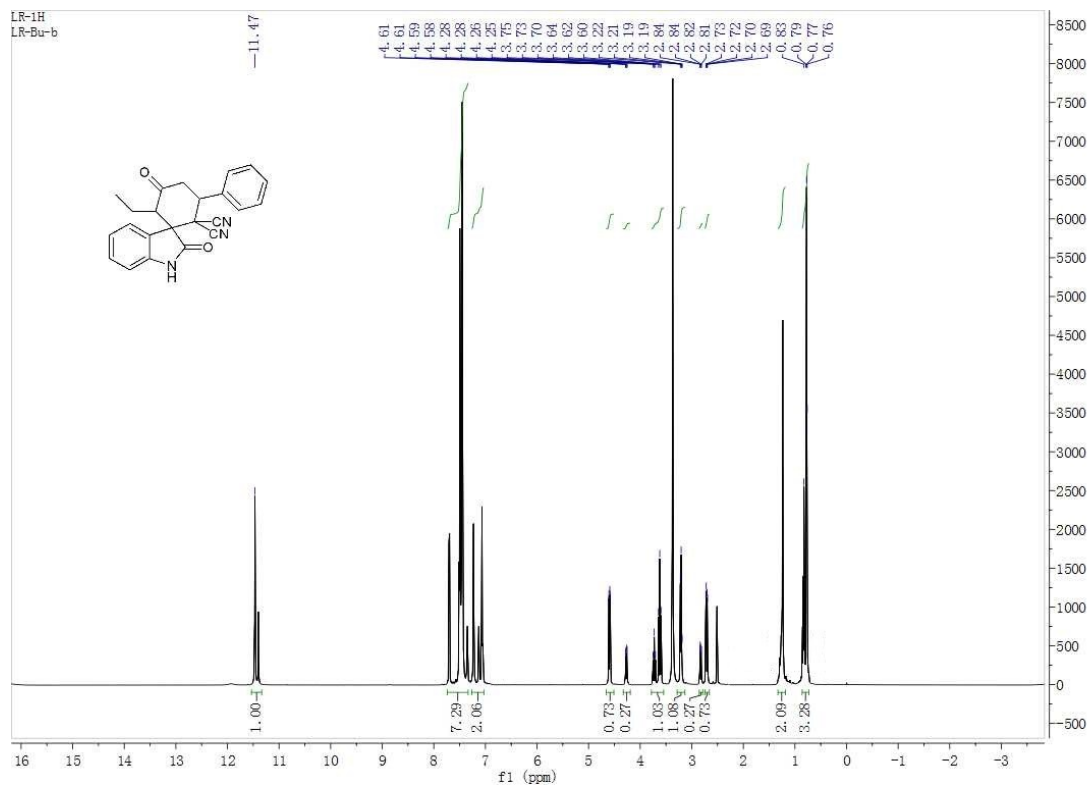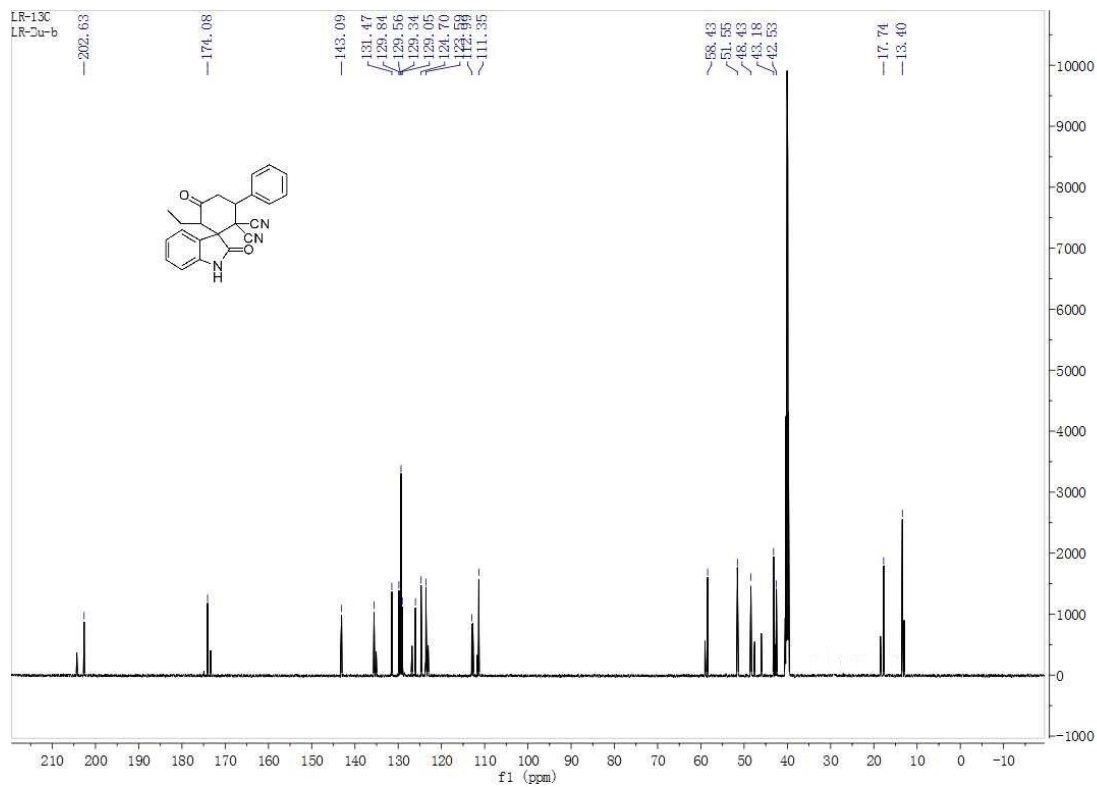

### 4z-HRMS

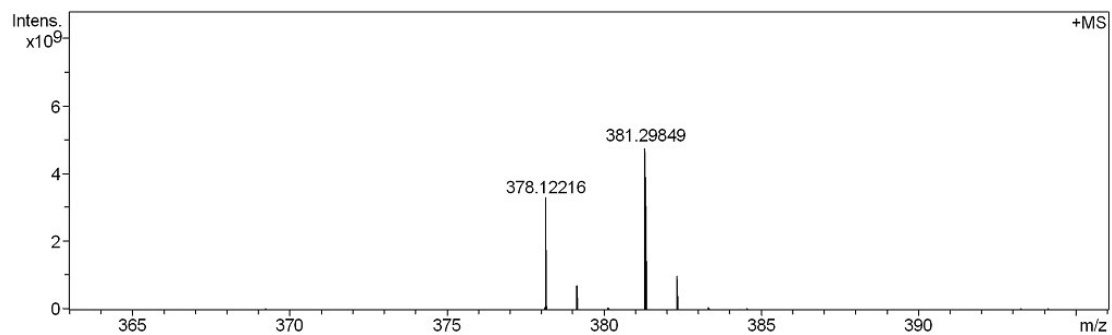

### 4aa- HRMS

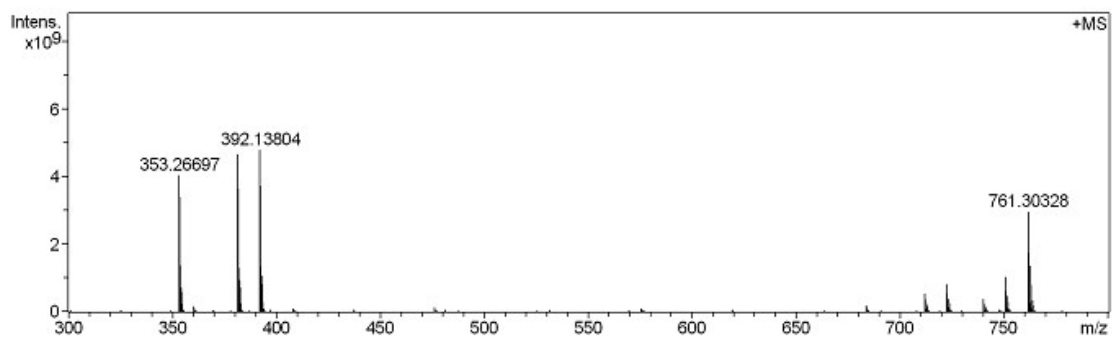

## 5. References

1. M. L. Anson, *The Journal of General Physiology*, 1938, **22**, 79-89.
2. Y.-B. Lan, H. Zhao, Z.-M. Liu, G.-G. Liu, J.-C. Tao and X.-W. Wang, *Org. Lett.*, 2011, **13**, 4866-4869.
